# Supplementary material for: Controlled ring-opening copolymerization of epoxides and cyclic anhydrides through bifunctional thiourea–quaternary ammonium salt catalysts
Source: Royal Society of Chemistry journal article supplement (doi:10.1039/d4py00687a), 2024-01-01
Supplement: d4py00687a1.pdf [file d4py00687a1.pdf]

## Supporting Information

for

# Controlled Ring-Opening Copolymerization of Epoxides and Cyclic Anhydrides Through Bifunctional Thiourea-Quaternary Ammonium Salt Catalysts

Kai-Yue Wang<sup>†</sup>, Zhuo-Qun Li<sup>†</sup>, Zi-Hui Li, Bo Li\*

College of Material, Chemistry and Chemical Engineering, Key Laboratory of Organosilicon  
Chemistry and Material Technology, Ministry of Education, Hangzhou Normal University,  
Hangzhou 310036, China

<sup>†</sup> These authors contributed equally to this research

## Content

|                                                                                                                   |     |
|-------------------------------------------------------------------------------------------------------------------|-----|
| 1. General Information.....                                                                                       | S2  |
| 2. General procedure for synthesis of the bifunctional thiourea catalysts.....                                    | S3  |
| 3. General procedure for synthesis of poly(CHO-alt-PA).....                                                       | S6  |
| 4. Comparison of the catalyst activity of the bifunctional catalyst and the two-component catalyst<br>system..... | S7  |
| 5. Copolymerization of Versatile Epoxides with Anhydrides by bifunctional thiourea catalyst....                   | S8  |
| 6. <sup>1</sup> H and <sup>13</sup> C NMR spectra for the bifunctional thiourea catalysts.....                    | S13 |
| 7. References.....                                                                                                | S24 |



## 1. General Information

### Materials

All reagents were commercially available and used directly unless otherwise stated. Propylene oxide (PO), cyclohexene oxide (CHO) were purchased from Acros. Phthalate anhydride (PA), succinic anhydride (SA), diethylene glycol anhydride (DGA) and maleic anhydride (MA) were purchased from TCI. All epoxides were dried over  $\text{CaH}_2$  for 48 h, distilled in  $\text{N}_2$  or vacuum, and stored under nitrogen atmosphere. PA, MA, SA and DGA were purified by sublimation before use. All manipulations were performed using a standard Schlenk technique or in a nitrogen-filled Etelux Lab 2000 glovebox unless otherwise mentioned.

### Instruments and measurements

NMR spectra were recorded on Bruker Avance 500 MHz spectrometers ( $^1\text{H}$  NMR 500 MHz,  $^{13}\text{C}$  NMR 126 MHz).  $^1\text{H}$  and  $^{13}\text{C}$  NMR chemical shifts are reported relative to residual solvent signals. All in-situ IR spectroscopic reactions were carried out with a Mettler-Toledo ReactIR 15 Reaction Analysis System fitted with a Sentinel DiComp (diamond) High-Pressure Probe. Data were acquired and analyzed using ReactIR software version 7.0, the infrared spectrometer was set to collect one spectrum every 15s over the corresponding reaction time. MALDI-TOF-MS analysis were performed on a Bruker Daltonics UltrafleXtreme system. Crude polymer samples were dissolved in dichloromethane at 10 mg/mL. The matrix was chosen as  $\alpha$ -cyano-4-hydroxycinnamic acid (HCCA). The resulting spectra were analyzed using the Bruker Daltonics flexAnalysis 3.4 software package. Gel permeation chromatography (GPC) was performed on a system equipped with a 1200 HPLC pump, an Optilab T-rEX RI detector, a ViscoStar-II viscometer and a DAWN HELEOS-II multiangle laser-light scattering (MALLS) detector at a wavelength of 690 nm (Wyatt Technology). One guard column and three  $7.8 \times 300$  mm columns (Styragel® HT 2 DMF, Styragel® HT 3 DMF and Styragel® HT 4 DMF) were used. The mobile phase consisted of DMF containing 0.1 M LiBr at a flow rate of  $1 \text{ mL min}^{-1}$ . Samples were filtered through a  $0.45 \mu\text{m}$  PTFE filter before analysis. Absolute molecular weights of polymers were determined using ASTRA software (Wyatt Technology).

## 2. General procedure for synthesis of the bifunctional thiourea catalysts C1-C10

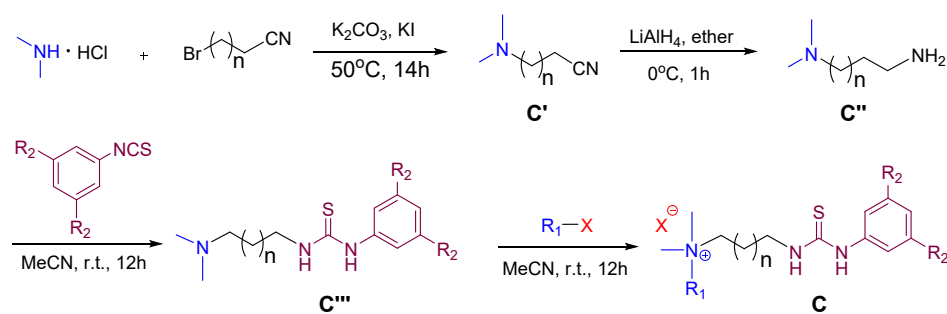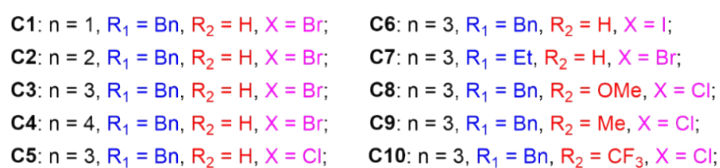

The bifunctional thiourea catalysts were synthesized by following the previous method.<sup>1</sup> Halogenated cyano compounds (3.3 mmol, 1.1 equiv) was diluted with 50 mL of acetonitrile and added to a suspension of dimethylamine hydrochloride (3.0 mmol, 1.0 equiv),  $\text{K}_2\text{CO}_3$  (4.5 mmol, 1.5 equiv) and  $\text{KI}$  (0.3 mmol, 0.1 equiv) in 40 mL of acetonitrile at  $50^\circ\text{C}$ . After stirring for 14 h, the reaction mixture was concentrated and further purified by extracting with 1.0 M brine and ether for three times. The ether phase was dried with  $\text{Na}_2\text{SO}_4$ , and the solvent was removed in vacuo to obtain tertiary aminated cyano **C'**. A suspension of  $\text{LiAlH}_4$  (3.0 mmol, 1.5 equiv) in ether was slowly added to the ether solution (40 mL) of **C'** (2.0 mmol, 1.0 equiv) at  $0^\circ\text{C}$  under nitrogen atmosphere. The mixture was stirred for 2 h at room temperature.  $\text{LiAlH}_4$  was inactivated with deionized water and ether phase was discarded. Aqueous phase was extracted with  $\text{CH}_2\text{Cl}_2$  for three times and dried with  $\text{Na}_2\text{SO}_4$ . Then the solvent was removed in vacuo to obtain primary amine compound **C''**. To a solution of **C''** (1.5 mmol, 1.0 equiv) in acetonitrile was added phenylisothiocyanate (1.65 mmol, 1.1 equiv) at room temperature. After stirred for 12 h, the reaction mixture was concentrated in vacuo and purified by washing with a mixed solvent (acetonitrile/*n*-hexane = 1/1) for three times to give the thiourea/tertiary amine catalyst precursor **C'''**. To a solution of **C'''** (1.0 mmol, 1.0 equiv) in acetonitrile was added benzyl bromide (1.1 mmol, 1.1 equiv) at room temperature. After stirring for 12 h, the reaction mixture was concentrated in vacuo and further purified by washing with a mixed solvent (acetonitrile/*n*-hexane = 1/1) for three times to give the pre-designed thiourea/quaternary ammonium salt bifunctional catalyst **C**.

Bifunctional catalyst **C1**. 3-Bromopropionitrile, phenyl isothiocyanate, and benzyl bromide were used to obtain white solid catalyst **C1** (42% total yield). <sup>1</sup>H NMR (500 MHz, *d*<sub>6</sub>-DMSO) δ 9.82 (s, 1H), 8.03 (t, *J* = 5.4 Hz, 1H), 7.61 – 7.56 (m, 2H), 7.55 – 7.50 (m, 2H), 7.49 (s, 1H), 7.40 (d, *J* = 7.4 Hz, 2H), 7.35 – 7.30 (m, 2H), 7.11 (dd, *J* = 10.4, 4.2 Hz, 1H), 4.57 (s, 2H), 3.63 – 3.50 (m, 2H), 3.32 – 3.26 (m, 2H), 2.99 (s, 6H), 2.17 – 2.08 (m, 2H). <sup>13</sup>C NMR (126 MHz, *d*<sub>6</sub>-DMSO): δ 178.9, 137.4, 131.2, 128.5, 127.2, 126.8, 126.3, 122.4, 121.2, 64.1, 59.3, 47.6, 40.4, 20.5. HRMS (ESI) calcd for C<sub>19</sub>H<sub>26</sub>N<sub>3</sub>S<sup>+</sup> [M–Br]<sup>+</sup> 328.1842, found 328.1848.

Bifunctional catalyst **C2**. 4-Bromobutyronitrile, phenyl isothiocyanate and benzyl bromide were used to obtain white solid catalyst **C2** (45% total yield). <sup>1</sup>H NMR (500 MHz, *d*<sub>6</sub>-DMSO) δ 9.86 (s, 1H), 8.13 (t, *J* = 5.3 Hz, 1H), 7.61 – 7.58 (m, 2H), 7.54 (dd, *J* = 13.1, 5.4 Hz, 3H), 7.49 (d, *J* = 8.1 Hz, 2H), 7.31 (t, *J* = 7.9 Hz, 2H), 7.09 (t, *J* = 7.3 Hz, 1H), 4.61 (d, *J* = 4.7 Hz, 2H), 3.54 (d, *J* = 5.7 Hz, 2H), 3.36 – 3.31 (m, 2H), 3.00 (s, 6H), 1.96 – 1.83 (m, 2H), 1.63 – 1.57 (m, 2H). <sup>13</sup>C NMR (126 MHz, *d*<sub>6</sub>-DMSO): δ 181.0, 139.9, 133.4, 130.7, 129.4, 129.0, 128.6, 124.4, 122.9, 66.7, 63.5, 49.7, 43.5, 25.9, 20.1. HRMS (ESI) calcd for C<sub>20</sub>H<sub>28</sub>N<sub>3</sub>S<sup>+</sup> [M–Br]<sup>+</sup> 342.1999, found 342.1991.

Bifunctional catalyst **C3**. 5-Bromovaleronitrile phenyl isothiocyanate and benzyl bromide were used to obtain white solid catalyst **C3** (53% total yield). <sup>1</sup>H NMR (500 MHz, *d*<sub>6</sub>-DMSO) δ 9.78 (s, 1H), 8.04 (t, *J* = 4.7 Hz, 1H), 7.57 (d, *J* = 6.0 Hz, 2H), 7.51 (d, *J* = 6.9 Hz, 3H), 7.47 (d, *J* = 7.9 Hz, 2H), 7.29 (t, *J* = 7.7 Hz, 2H), 7.07 (t, *J* = 7.2 Hz, 1H), 4.57 (s, 2H), 3.51 (s, 2H), 3.32 – 3.25 (m, 2H), 2.97 (s, 6H), 1.83 (s, 2H), 1.66 – 1.56 (m, 2H), 1.39 – 1.28 (m, 2H). <sup>13</sup>C NMR (126 MHz, *d*<sub>6</sub>-DMSO): δ 178.7, 137.8, 131.2, 128.5, 127.2, 126.8, 126.4, 122.1, 120.9, 64.4, 61.7, 47.4, 41.5, 26.3, 21.6, 19.9. HRMS (ESI) calcd for C<sub>21</sub>H<sub>30</sub>N<sub>3</sub>S<sup>+</sup> [M–Br]<sup>+</sup> 356.2155, found 356.2148.

Bifunctional catalyst **C4**. 6-Bromohexanonitrile, phenyl isothiocyanate and benzyl bromide were used to obtain white solid catalyst **C4** (58% total yield). <sup>1</sup>H NMR (500 MHz, *d*<sub>6</sub>-DMSO) δ 9.74 (s, 1H), 7.98 (t, *J* = 5.2 Hz, 1H), 7.56 (d, *J* = 7.6 Hz, 2H), 7.51 (t, *J* = 6.1 Hz, 3H), 7.47 (d, *J* = 7.9 Hz, 2H), 7.28 (t, *J* = 7.8 Hz, 2H), 7.06 (t, *J* = 7.3 Hz, 1H), 4.57 (s, 2H), 3.47 (s, 2H), 3.31 – 3.24 (m, 2H), 2.96 (s, 6H), 1.80 (dt, *J* = 15.3, 7.9 Hz, 2H), 1.56 (dt, *J* = 14.4, 7.2 Hz, 2H), 1.43 – 1.34 (m, 2H), 1.31 (dd, *J* = 14.1, 7.1 Hz, 2H). <sup>13</sup>C NMR (126 MHz, *d*<sub>6</sub>-DMSO): δ 180.9, 140.0, 133.4, 130.7, 129.4, 128.9, 128.7, 124.3, 123.0, 66.5, 63.9, 49.6, 43.9, 28.6, 26.3, 26.0, 22.2. HRMS (ESI) calcd for C<sub>22</sub>H<sub>32</sub>N<sub>3</sub>S<sup>+</sup> [M–Br]<sup>+</sup> 370.2312, found 370.2303.

Bifunctional catalyst **C5**. 5-Bromovaleronitrile, phenyl isothiocyanate and benzyl chloride were

used to obtain white solid catalyst C5 (55% total yield). <sup>1</sup>H NMR (500 MHz, *d*<sub>6</sub>-DMSO) δ 10.39 (s, 1H), 8.63 (s, 1H), 7.57 (d, *J* = 7.8 Hz, 2H), 7.52 (t, *J* = 6.4 Hz, 3H), 7.45 (d, *J* = 7.6 Hz, 2H), 7.36 (t, *J* = 7.7 Hz, 2H), 7.14 (t, *J* = 7.4 Hz, 1H), 4.59 (s, 2H), 3.52 (s, 2H), 3.29 (m, 2H), 2.96 (s, 6H), 1.80 (dt, *J* = 15.2, 7.9 Hz, 2H), 1.61 (dt, *J* = 14.2, 7.2 Hz, 2H), 1.38 (m, 2H). <sup>13</sup>C NMR (126 MHz, *d*<sub>6</sub>-DMSO) δ 181.07, 140.46, 133.44, 130.70, 129.38, 128.74, 128.65, 123.85, 122.54, 66.58, 63.89, 49.60, 43.44, 28.43, 23.85, 22.10. HRMS (ESI) calcd for C<sub>21</sub>H<sub>30</sub>N<sub>3</sub>S<sup>+</sup> [M-Cl]<sup>+</sup> 356.2155, found 356.2142.

Bifunctional catalyst C6. 5-Bromovaleronitrile, phenyl isothiocyanate and benzyl iodide were used to obtain white solid catalyst C6 (48% total yield). <sup>1</sup>H NMR (500 MHz, *d*<sub>6</sub>-DMSO) δ 9.55 (s, 1H), 7.82 (s, 1H), 7.58 – 7.53 (m, 5H), 7.41 (d, *J* = 7.7 Hz, 2H), 7.34 – 7.29 (m, 2H), 7.10 (t, *J* = 7.3 Hz, 1H), 4.54 (s, 2H), 3.51 (s, 2H), 3.27 (m, 2H), 2.97 (s, 6H), 1.90 – 1.78 (m, 2H), 1.61 (m, 2H), 1.39 – 1.29 (m, 2H). <sup>13</sup>C NMR (126 MHz, *d*<sub>6</sub>-DMSO) δ 180.83, 133.41, 130.76, 129.42, 129.09, 128.57, 124.56, 123.43, 66.74, 63.90, 49.66, 42.71, 28.53, 23.77, 22.11. HRMS (ESI) calcd for C<sub>21</sub>H<sub>30</sub>N<sub>3</sub>S<sup>+</sup> [M-I]<sup>+</sup> 356.2155, found 356.2148.

Bifunctional catalyst C7. 5-Bromovaleronitrile, phenyl isothiocyanate and ethyl bromide were used to obtain white solid catalyst C7 (65% total yield). <sup>1</sup>H NMR (500 MHz, *d*<sub>6</sub>-DMSO) δ 9.92 (s, 1H), 8.16 (s, 1H), 7.53 (d, *J* = 7.7 Hz, 2H), 7.30 (t, *J* = 7.7 Hz, 2H), 7.08 (t, *J* = 7.1 Hz, 1H), 3.51 (d, *J* = 4.1 Hz, 3H), 3.35 (s, 2H), 3.31 – 3.23 (m, 2H), 3.01 (s, 6H), 1.69 (s, 2H), 1.64 – 1.55 (m, 2H), 1.39 – 1.26 (m, 2H), 1.26 – 1.20 (m, 2H). <sup>13</sup>C NMR (126 MHz, *d*<sub>6</sub>-DMSO) δ 178.64, 137.80, 126.61, 121.93, 120.63, 60.49, 56.69, 47.64, 42.75, 41.30, 26.12, 21.43, 19.65. HRMS (ESI) calcd for C<sub>16</sub>H<sub>28</sub>N<sub>3</sub>S<sup>+</sup> [M-Br]<sup>+</sup> 294.1999, found 294.1990.

Bifunctional catalyst C8. 5-Bromovaleronitrile, 3,5-dimethoxy-phenyl isothiocyanate and benzyl chloride were used to obtain white solid catalyst C8 (42% total yield). <sup>1</sup>H NMR (500 MHz, *d*<sub>6</sub>-DMSO) δ 10.43 (s, 1H), 8.61 (s, 1H), 7.69 – 7.25 (m, 5H), 6.90 (d, *J* = 7.9 Hz, 2H), 6.21 (s, 1H), 4.61 (s, 2H), 3.72 (m, 6H), 3.57 – 3.46 (m, 2H), 3.36 – 3.27 (m, 2H), 2.99 (s, 6H), 1.85 (s, 2H), 1.66 – 1.55 (m, 2H), 1.44 – 1.31 (m, 2H). <sup>13</sup>C NMR (126 MHz, *d*<sub>6</sub>-DMSO) δ 178.52, 158.42, 139.97, 131.26, 128.51, 127.20, 127.13, 126.94, 126.49, 102.47, 98.11, 93.47, 64.37, 61.69, 53.40, 47.41, 40.12, 26.19, 21.70, 21.54. HRMS (ESI) calcd for C<sub>23</sub>H<sub>34</sub>N<sub>3</sub>O<sub>2</sub>S<sup>+</sup> [M-Cl]<sup>+</sup> 416.2367, found 416.2353.

Bifunctional catalyst C9. 5-Bromovaleronitrile, 3,5-dimethoxy-phenyl isothiocyanate and benzyl

chloride were used to obtain white solid catalyst C9 (56% total yield). <sup>1</sup>H NMR (500 MHz, *d*<sub>6</sub>-DMSO) δ 10.07 (s, 1H), 8.29 (d, *J* = 85.8 Hz, 1H), 7.67 – 7.45 (m, 5H), 7.11 (d, *J* = 7.8 Hz, 2H), 6.71 (s, 1H), 4.55 (s, 2H), 3.50 (d, *J* = 5.6 Hz, 2H), 3.28 (m, 2H), 2.97 (s, 6H), 2.24 (d, *J* = 2.1 Hz, 6H), 1.84 (m, 2H), 1.60 (m, 2H), 1.35 (m, 2H). <sup>13</sup>C NMR (126 MHz, *d*<sub>6</sub>-DMSO) δ 180.89, 140.00, 137.82, 133.42, 130.71, 129.40, 128.63, 126.90, 120.61, 66.65, 63.92, 49.62, 43.54, 28.46, 23.84, 22.08, 21.49. HRMS (ESI) calcd for C<sub>23</sub>H<sub>34</sub>N<sub>3</sub>S<sup>+</sup> [M-Cl]<sup>+</sup> 384.2468, found 384.2462.

Bifunctional catalyst **C10**. 5-Bromovaleronitrile, 3,5-ditrifluoromethyl-phenyl isothiocyanate and benzyl chloride were used to obtain white solid catalyst 10 (48% total yield). <sup>1</sup>H NMR (500 MHz, *d*<sub>6</sub>-DMSO) δ 11.23 (s, 1H), 8.86 (s, 1H), 8.41 (s, 2H), 7.69 (s, 1H), 7.54 (dd, *J* = 9.2, 6.5 Hz, 5H), 4.53 (s, 2H), 3.53 (d, *J* = 5.6 Hz, 2H), 3.31 – 3.22 (m, 2H), 2.95 (s, 6H), 1.92 – 1.77 (m, 2H), 1.69 – 1.56 (m, 2H), 1.44 – 1.31 (m, 2H). <sup>13</sup>C NMR (126 MHz, DMSO) δ 182.89 – 179.06, 142.81, 133.41, 130.69, 129.38, 128.60, 124.83, 122.4, 120.95, 115.98, 66.66, 63.88, 49.63, 43.46, 28.10, 23.81, 22.06. HRMS (ESI) calcd for C<sub>23</sub>H<sub>28</sub>F<sub>6</sub>N<sub>3</sub>S<sup>+</sup> [M-Cl]<sup>+</sup> 492.1903, found 492.1892.

### 3. General procedure for synthesis of poly(CHO-*alt*-PA)

In a glovebox, PA (0.3 g, 4.08 mmol), catalyst **C1** (7.0 mg, 20.38 μmol), and CHO (0.8 g, 8.15 mmol) were added into a 10-mL vial equipped with magnetic stirrer (The excess CHO was added as an alternative for a solvent to dissolve the catalyst and PA and to ensure the smooth enchainment during the ROPCOP process). The reaction mixture was heated to the target temperature and maintain it for the corresponding time. After the reaction was completed, it was cooled down to the room temperature, and added a small amount of CH<sub>2</sub>Cl<sub>2</sub> to dissolve all unreacted PA into a clear solution. A small portion of the solution was taken out, and analyzed the conversion rate of PA and the selectivity of polyester using <sup>1</sup>H NMR. The other part of the solution was dropped into the stirred *n*-hexane to precipitate the polymer. Then the solid was filtered and dried to obtain the poly(CHO-*alt*-PA). In all catalytic results, the selectivity of polyester is > 99%.

### 4. Comparison of the catalyst activity of the bifunctional catalyst C3 and the two-

## component catalyst system

**Table S1** Comparison of the catalyst activity of the bifunctional catalyst **C3** and the two-component catalyst system with the same structure.<sup>a</sup>

| Entry | CHO:PA:Cat.   | t<br>(min) | Conv. (%) <sup>b</sup> |    | TOF (h <sup>-1</sup> ) <sup>c</sup> |     | Ester (%) <sup>b</sup> |
|-------|---------------|------------|------------------------|----|-------------------------------------|-----|------------------------|
|       |               |            | TU/TBAB                | C3 | TU/TBAB                             | C3  |                        |
| 1     | 200:100:1     | 20         | 26                     | 24 | 76                                  | 72  | >99                    |
| 2     | 500:250:1     | 40         | 28                     | 24 | 105                                 | 90  | >99                    |
| 3     | 1000:500:1    | 60         | 21                     | 19 | 103                                 | 95  | >99                    |
| 4     | 2000:1000:1   | 100        | 15                     | 17 | 90                                  | 102 | >99                    |
| 5     | 4000:2000:1   | 180        | 11                     | 20 | 73                                  | 133 | >99                    |
| 6     | 8000:4000:1   | 270        | 5                      | 18 | 44                                  | 160 | >99                    |
| 7     | 12000:6000:1  | 720        | 7                      | 30 | 35                                  | 150 | >99                    |
| 8     | 16000:8000:1  | 1440       | 7                      | 38 | 23                                  | 126 | >99                    |
| 9     | 20000:10000:1 | 1440       | 3                      | 28 | 12                                  | 116 | >99                    |
| 10    | 24000:12000:1 | 1440       | <1                     | 19 | -                                   | 95  | >99                    |

<sup>a</sup>All polymerizations were carried out under conditions of strict removal of water and oxygen at 100 °C.

<sup>b</sup>Conv. is the conversion of PA, and ester means the content of polyester in the polymer, which were determined by <sup>1</sup>H NMR spectroscopy. <sup>c</sup>TOF is the turnover frequency, calculated by (PA conversion)/(catalyst loading)/h.

## 5. Copolymerization of Versatile Epoxides with Anhydrides by bifunctional



## thiourea catalyst

**Table S2** Copolymerization of Versatile Epoxides with Anhydrides.<sup>a</sup>

| Entry          | Epoxide | Anhydride | Time (h) | Conv. <sup>b</sup> (%) | Ester <sup>b</sup> (%) | Mn <sup>c</sup> (kDa) | D <sup>c</sup> |
|----------------|---------|-----------|----------|------------------------|------------------------|-----------------------|----------------|
| 1              | PO      | PA        | 24       | >99                    | >99                    | 5.7                   | 1.11           |
| 2              | PO      | SA        | 24       | >99                    | >99                    | 6.3                   | 1.12           |
| 3              | PO      | DGA       | 24       | >99                    | >99                    | 7.5                   | 1.09           |
| 4 <sup>d</sup> | PO      | MA        | 24       | -                      | -                      | -                     | -              |
| 5              | CHO     | PA        | 12       | >99                    | >99                    | 13.6                  | 1.13           |
| 6              | CHO     | SA        | 12       | >99                    | >75                    | 5.8                   | 1.12           |
| 7              | CHO     | DGA       | 12       | >99                    | >99                    | 4.3                   | 1.14           |
| 8 <sup>d</sup> | CHO     | MA        | 12       | -                      | -                      | -                     | -              |

<sup>a</sup>All polymerizations were carried out under conditions of strict removal of water and oxygen at 100 °C with an epoxide/anhydride/C5 feeding ratio of 200:100:1. <sup>b</sup> Conv.(%) is the conversion of the anhydrides, and ester(%) is the percentage of ester linkage in the polymer, which were both determined by <sup>1</sup>H NMR spectroscopy. <sup>c</sup>Determined by GPC in THF, calibrated with polystyrene standards. <sup>d</sup> The reaction product was crosslinked and insoluble.

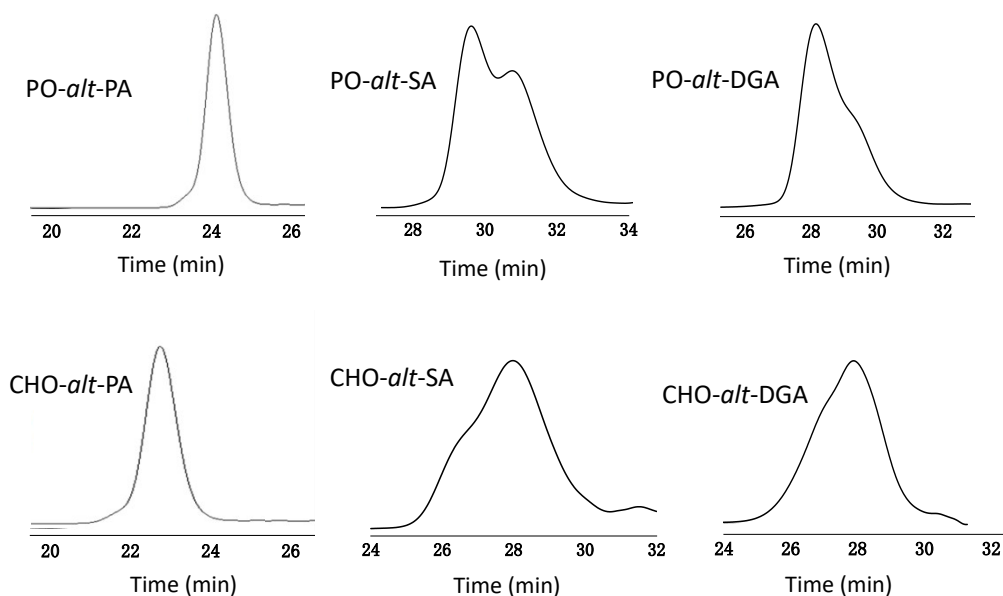

**Figure S1** GPC of the resulted poly(epoxide-*alt*-anhydride)

## <sup>1</sup>H and <sup>13</sup>C NMR spectra for the resulted poly(epoxide-*alt*-anhydride)

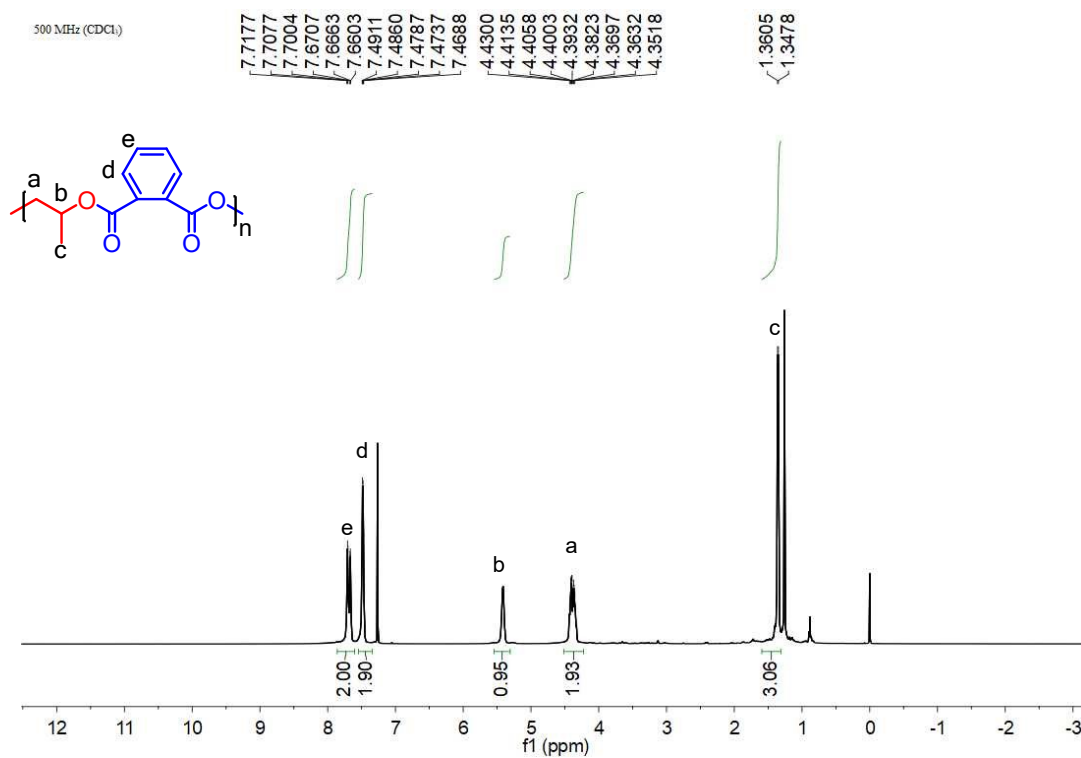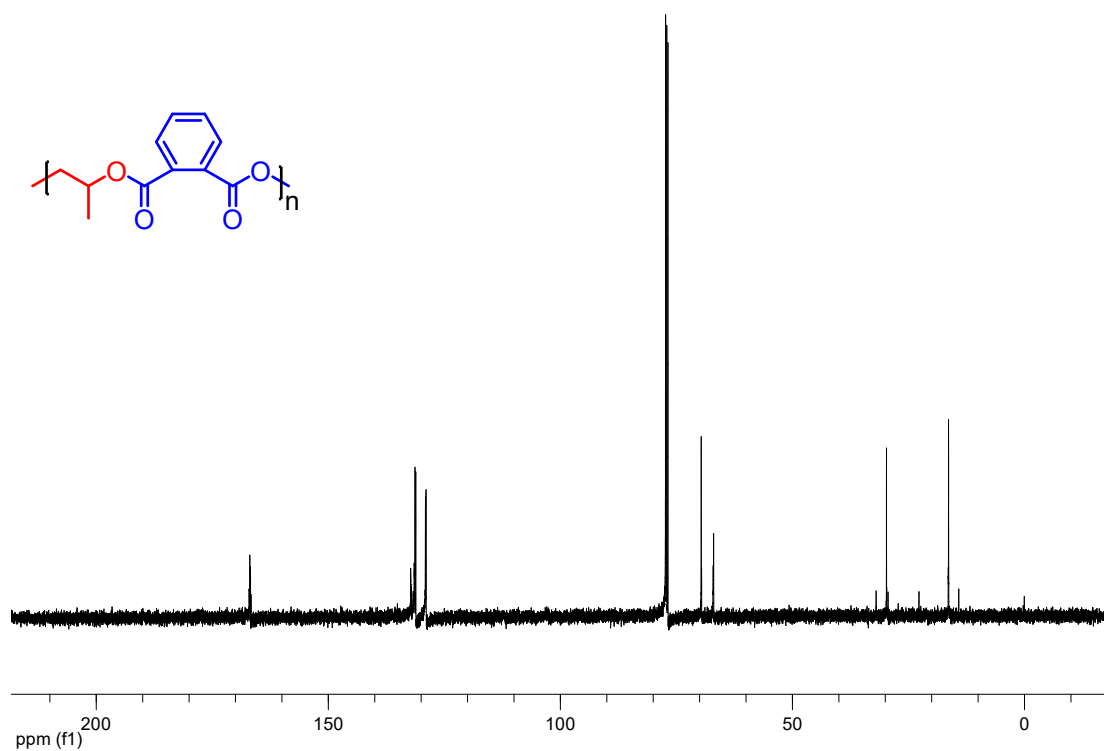

**Figure S2** <sup>1</sup>H (500 M) and <sup>13</sup>C (126 M) NMR spectra for the resulted poly(PO-*alt*-PA) in CDCl<sub>3</sub>

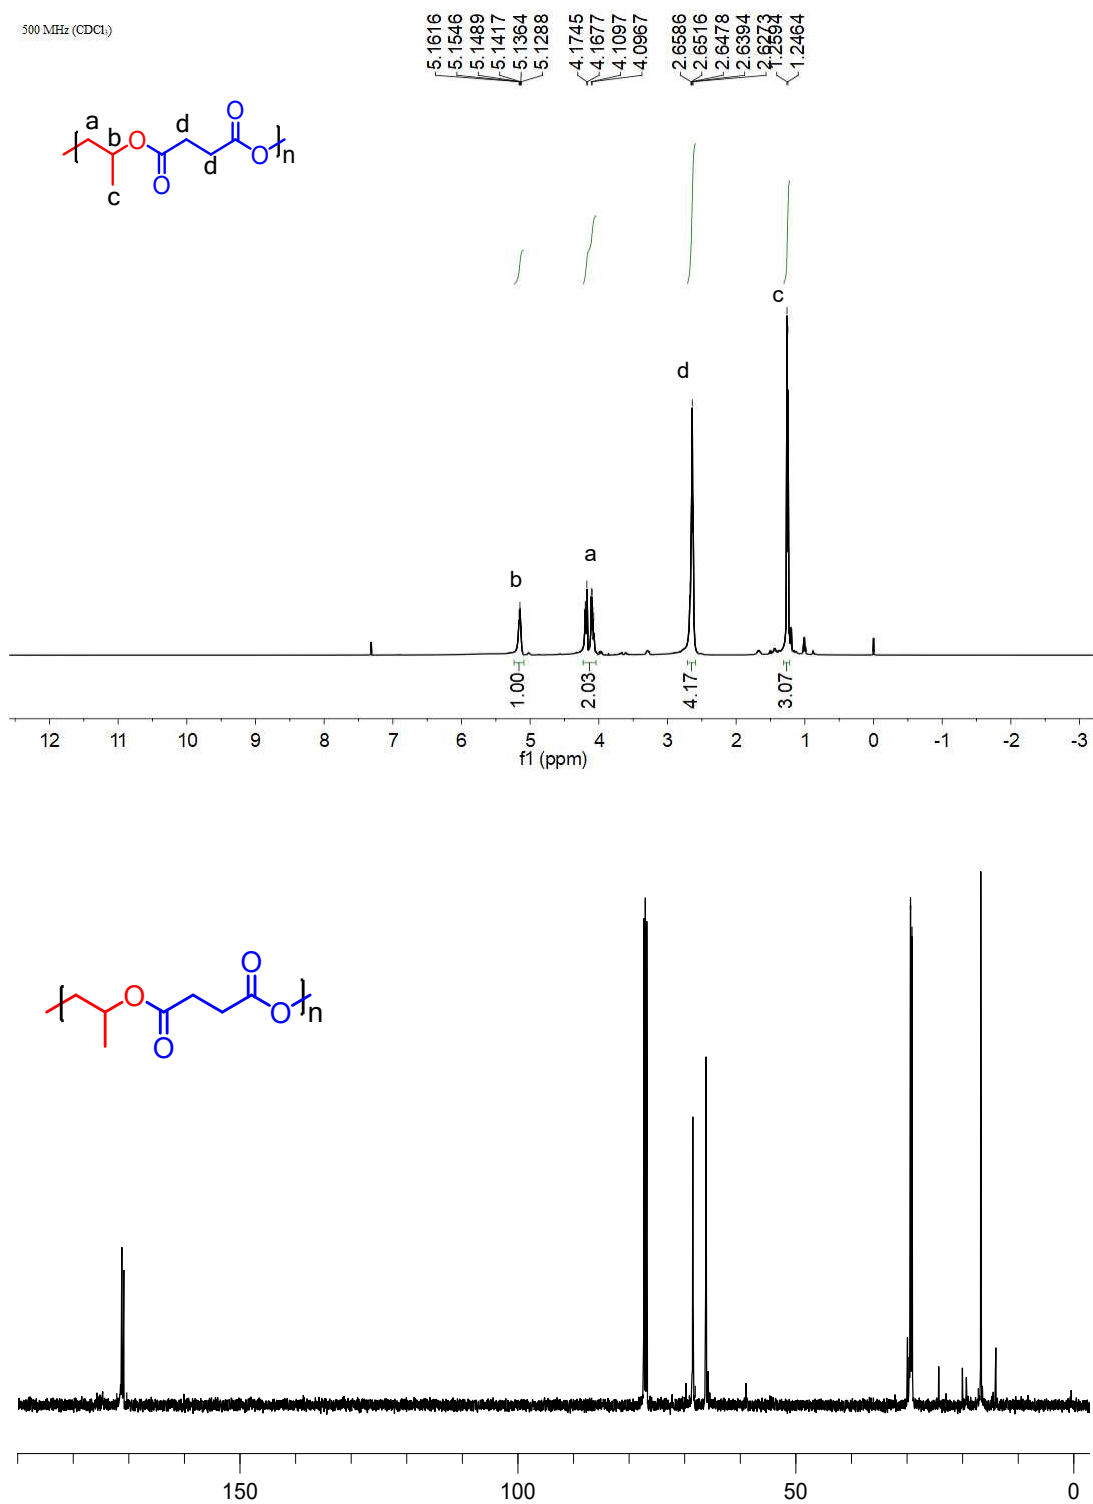

Figure S3 <sup>1</sup>H (500 M) and <sup>13</sup>C (126 M) NMR spectra for the resulted poly(PO-*alt*-SA) in CDCl<sub>3</sub>

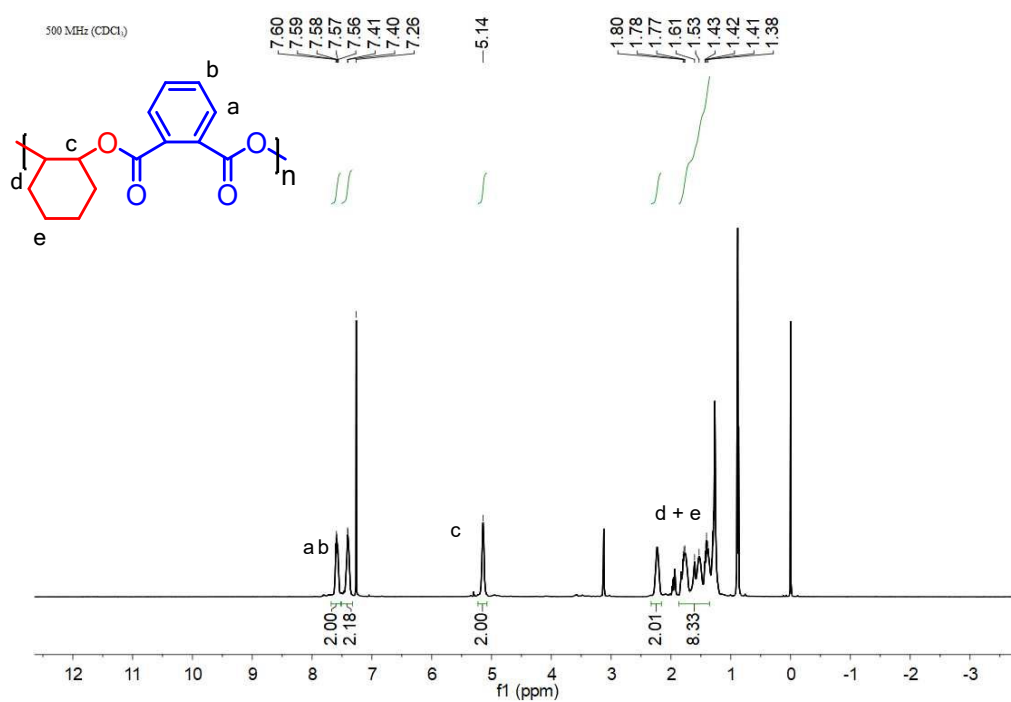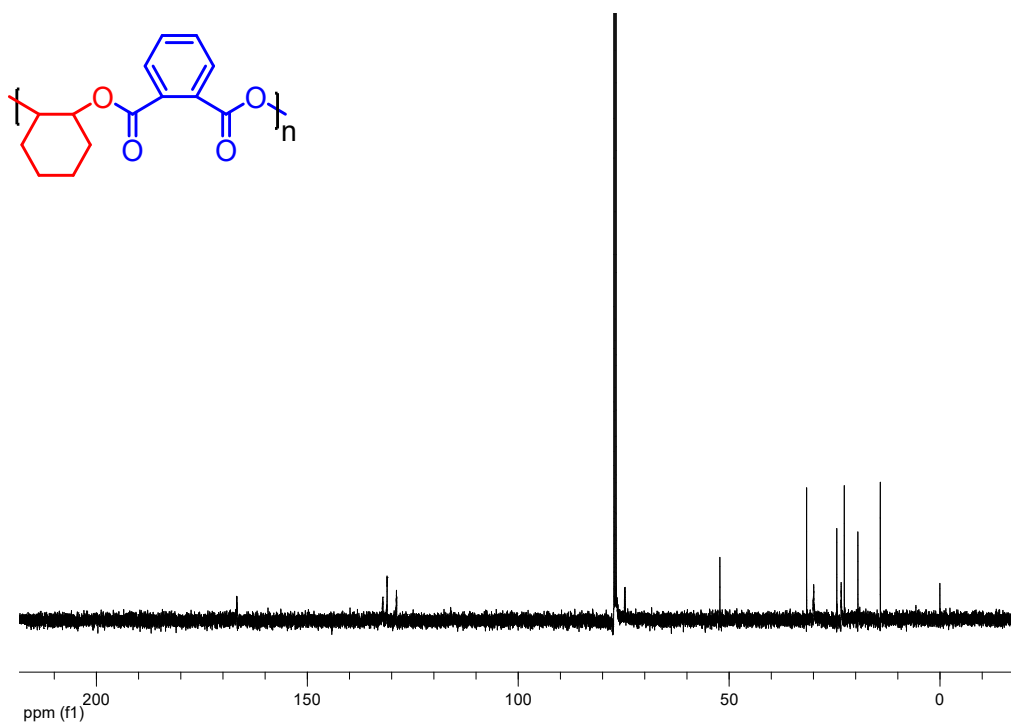

**Figure S4** <sup>1</sup>H (500 M) and <sup>13</sup>C (126 M) NMR spectra for the resulted poly(CHO-*alt*-PA) in CDCl<sub>3</sub>

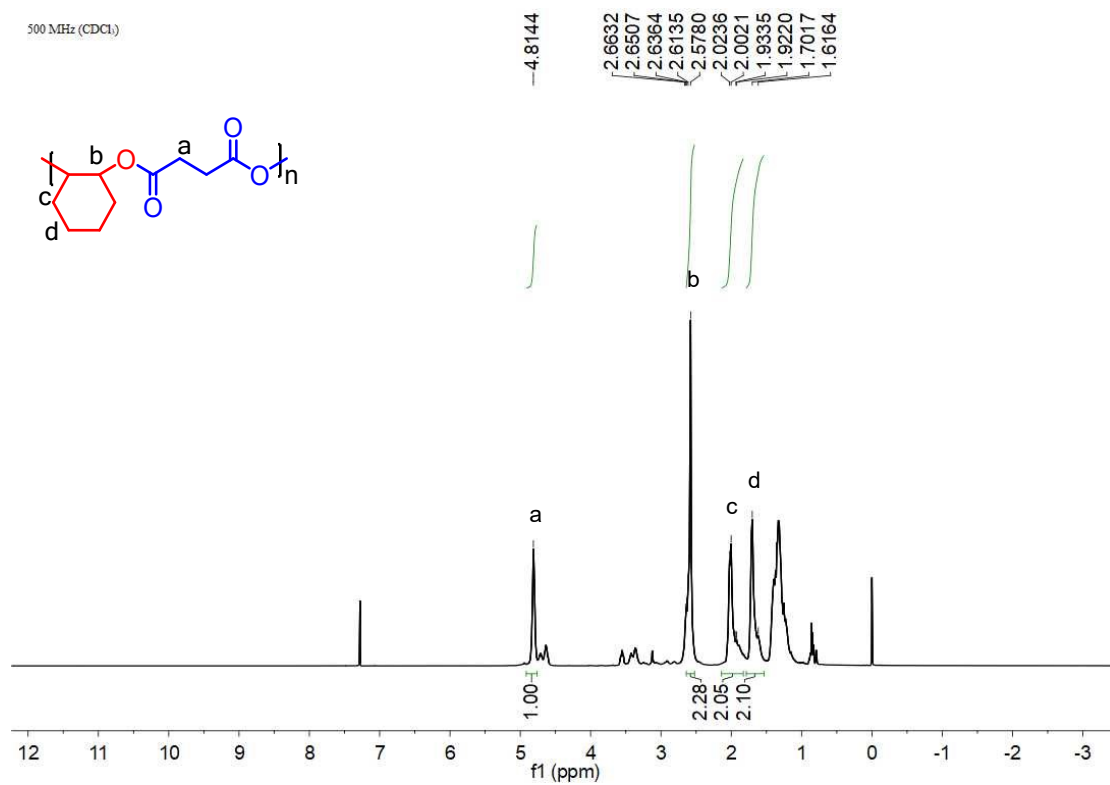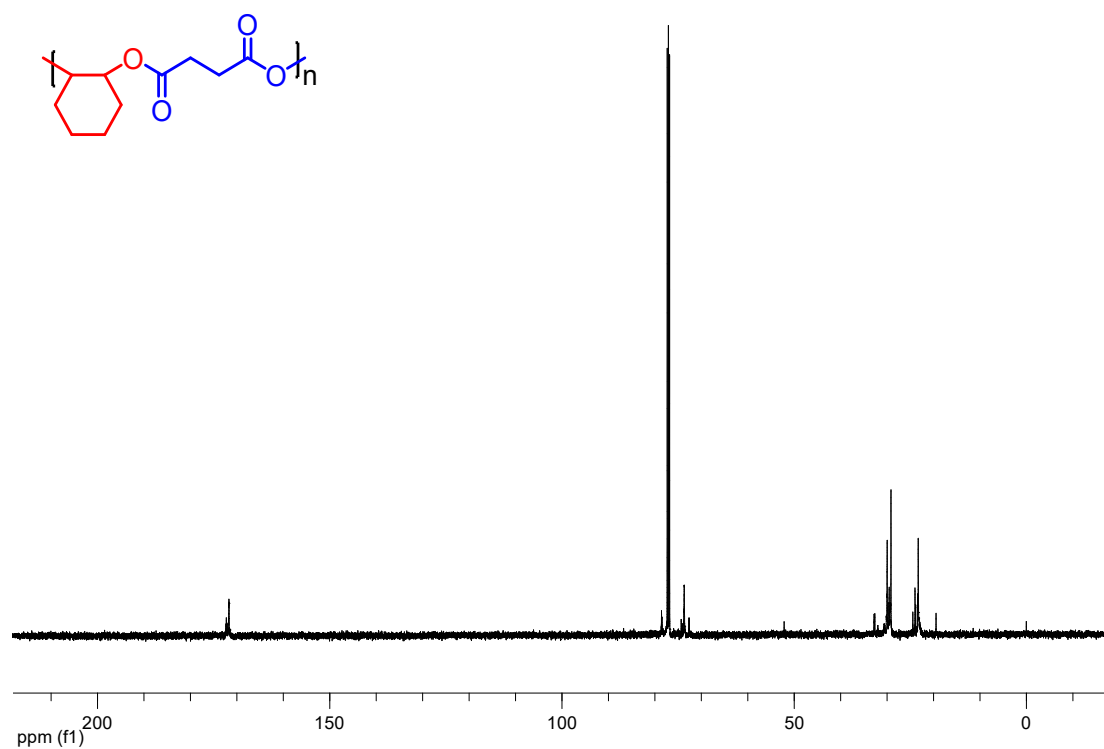

**Figure S5** <sup>1</sup>H (500 M) and <sup>13</sup>C (126 M) NMR spectra for the resulted poly(CHO-*alt*-SA) in CDCl<sub>3</sub>

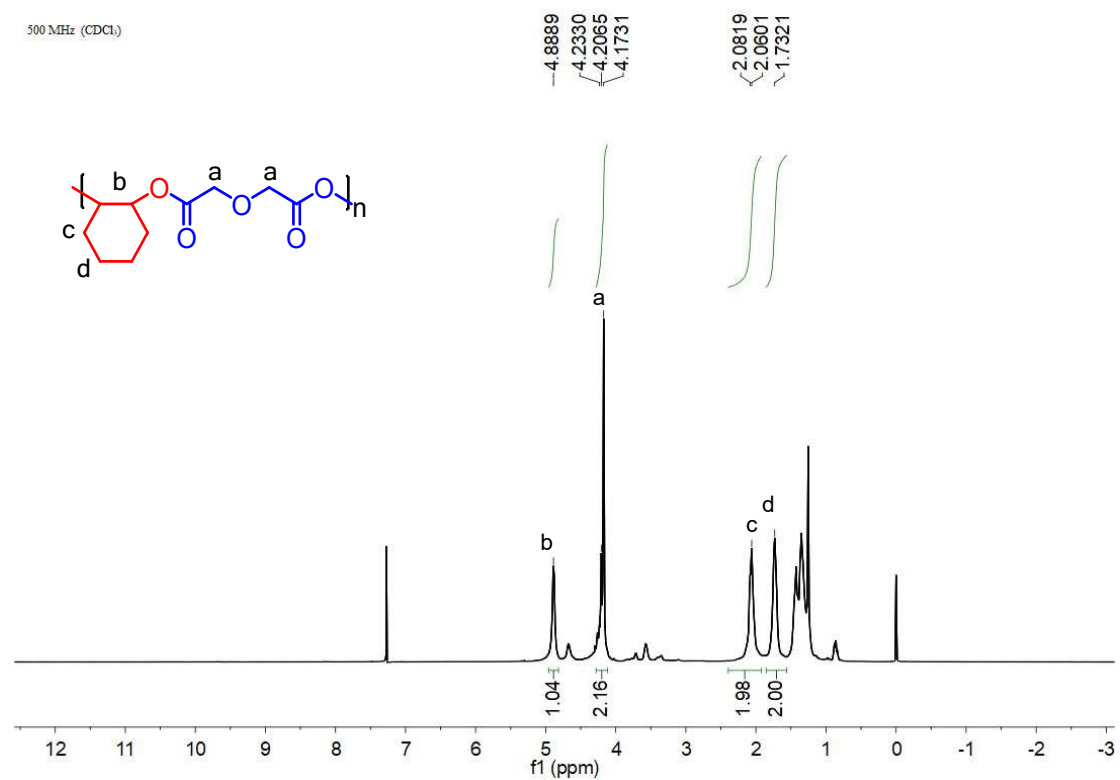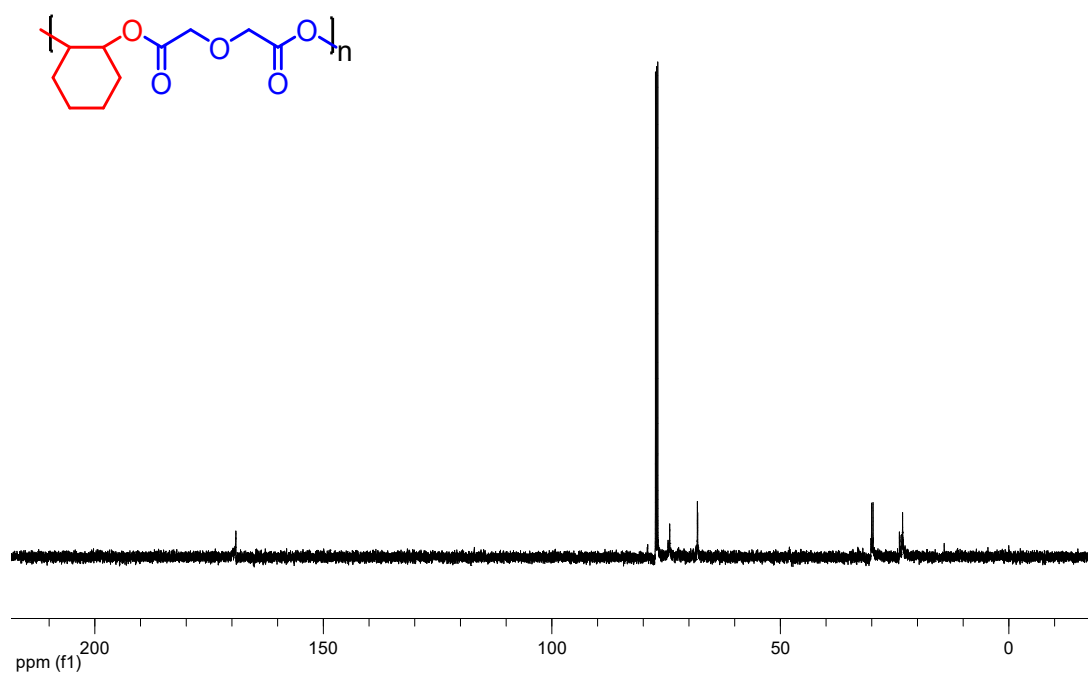

**Figure S6** <sup>1</sup>H (500 M) and <sup>13</sup>C (126 M) NMR spectra for the resulted poly(CHO-*alt*-DGA) in CDCl<sub>3</sub>

## 6. $^1\text{H}$ and $^{13}\text{C}$ NMR spectra for the bifunctional thioure catalysts

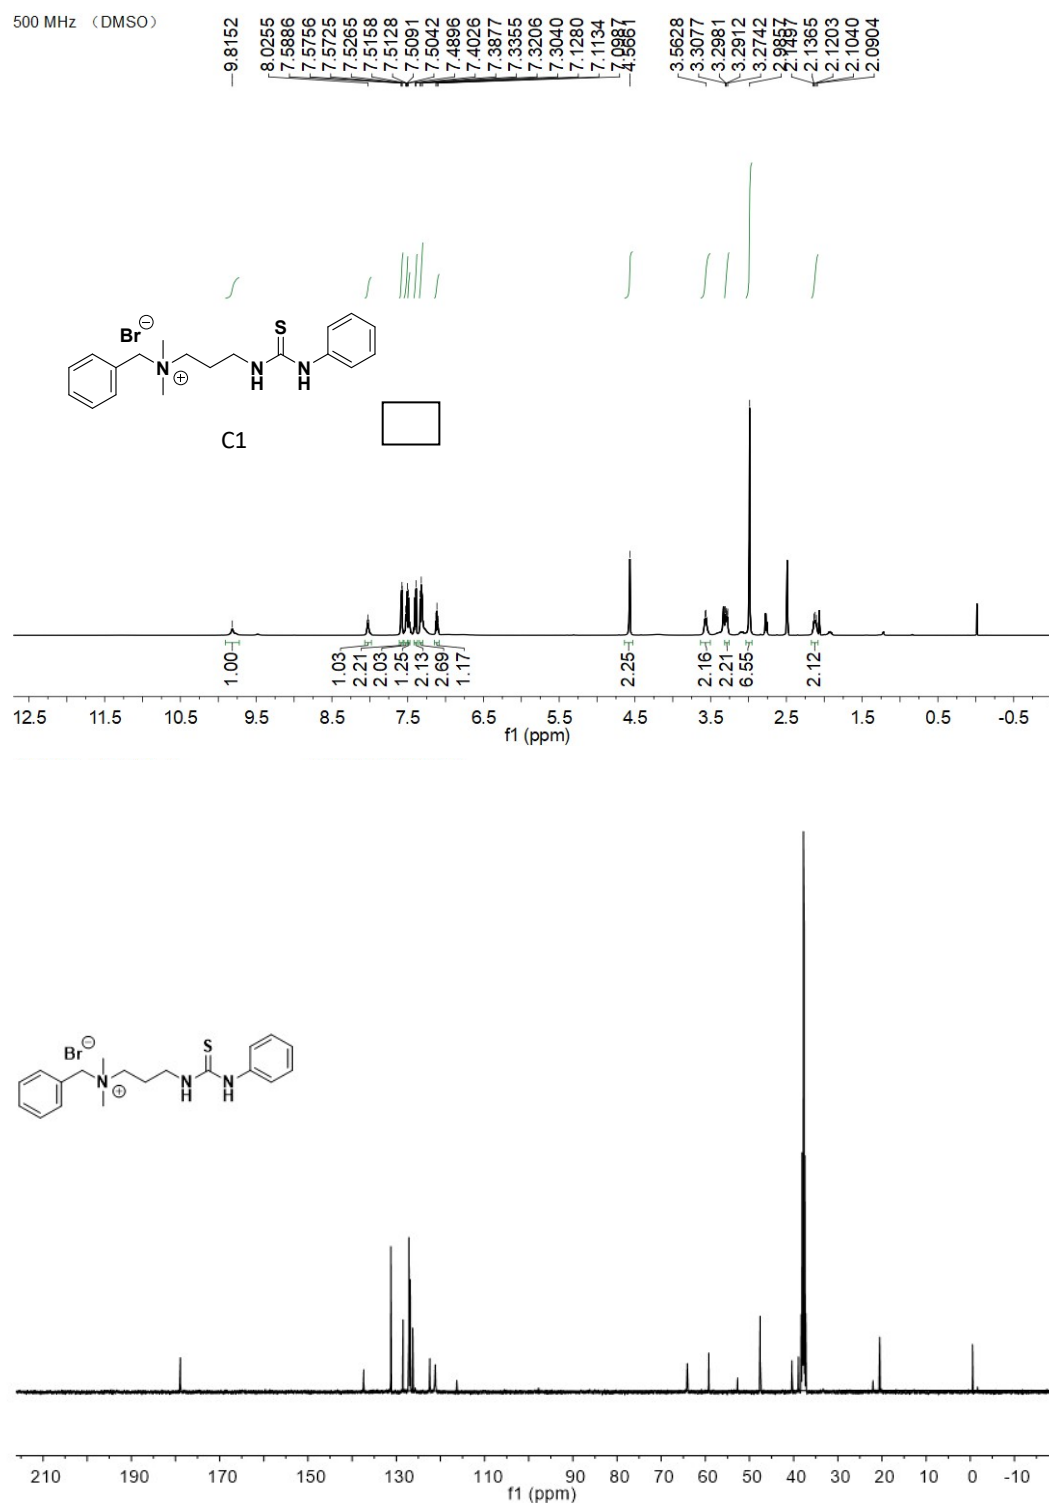

**Figure S7**  $^1\text{H}$  (500 M) and  $^{13}\text{C}$  (126 M) NMR spectra for the bifunctional catalyst **C1** in DMSO

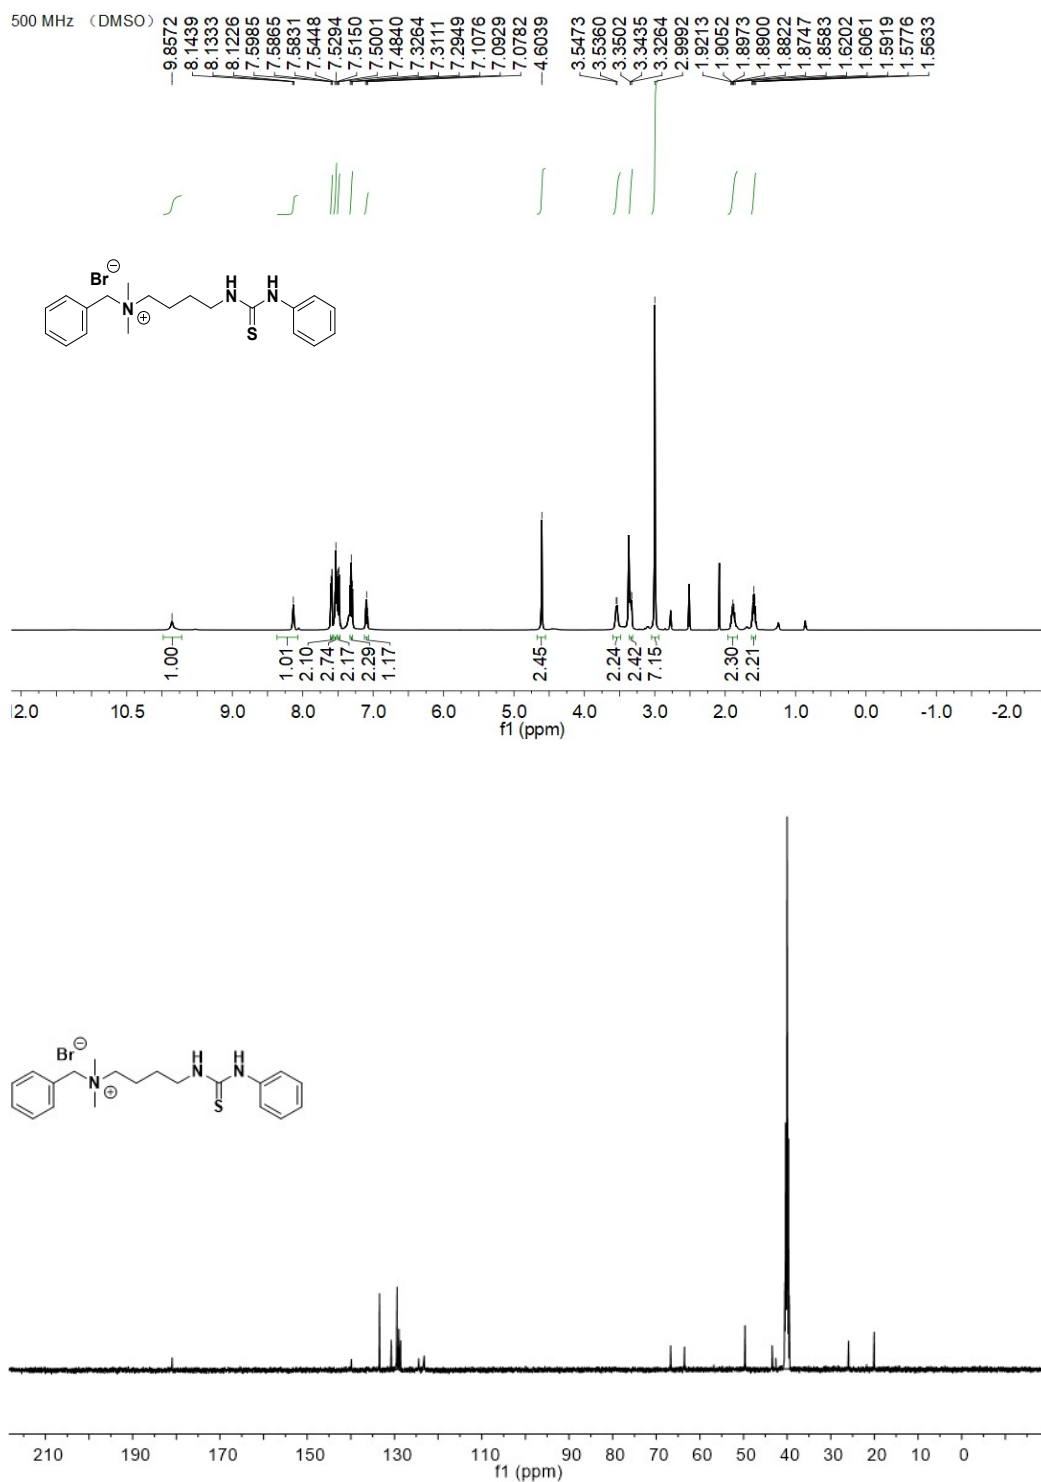

**Figure S8**  $^1\text{H}$  (500 M) and  $^{13}\text{C}$  (126 M) NMR spectra for the bifunctional catalyst **C2** in DMSO



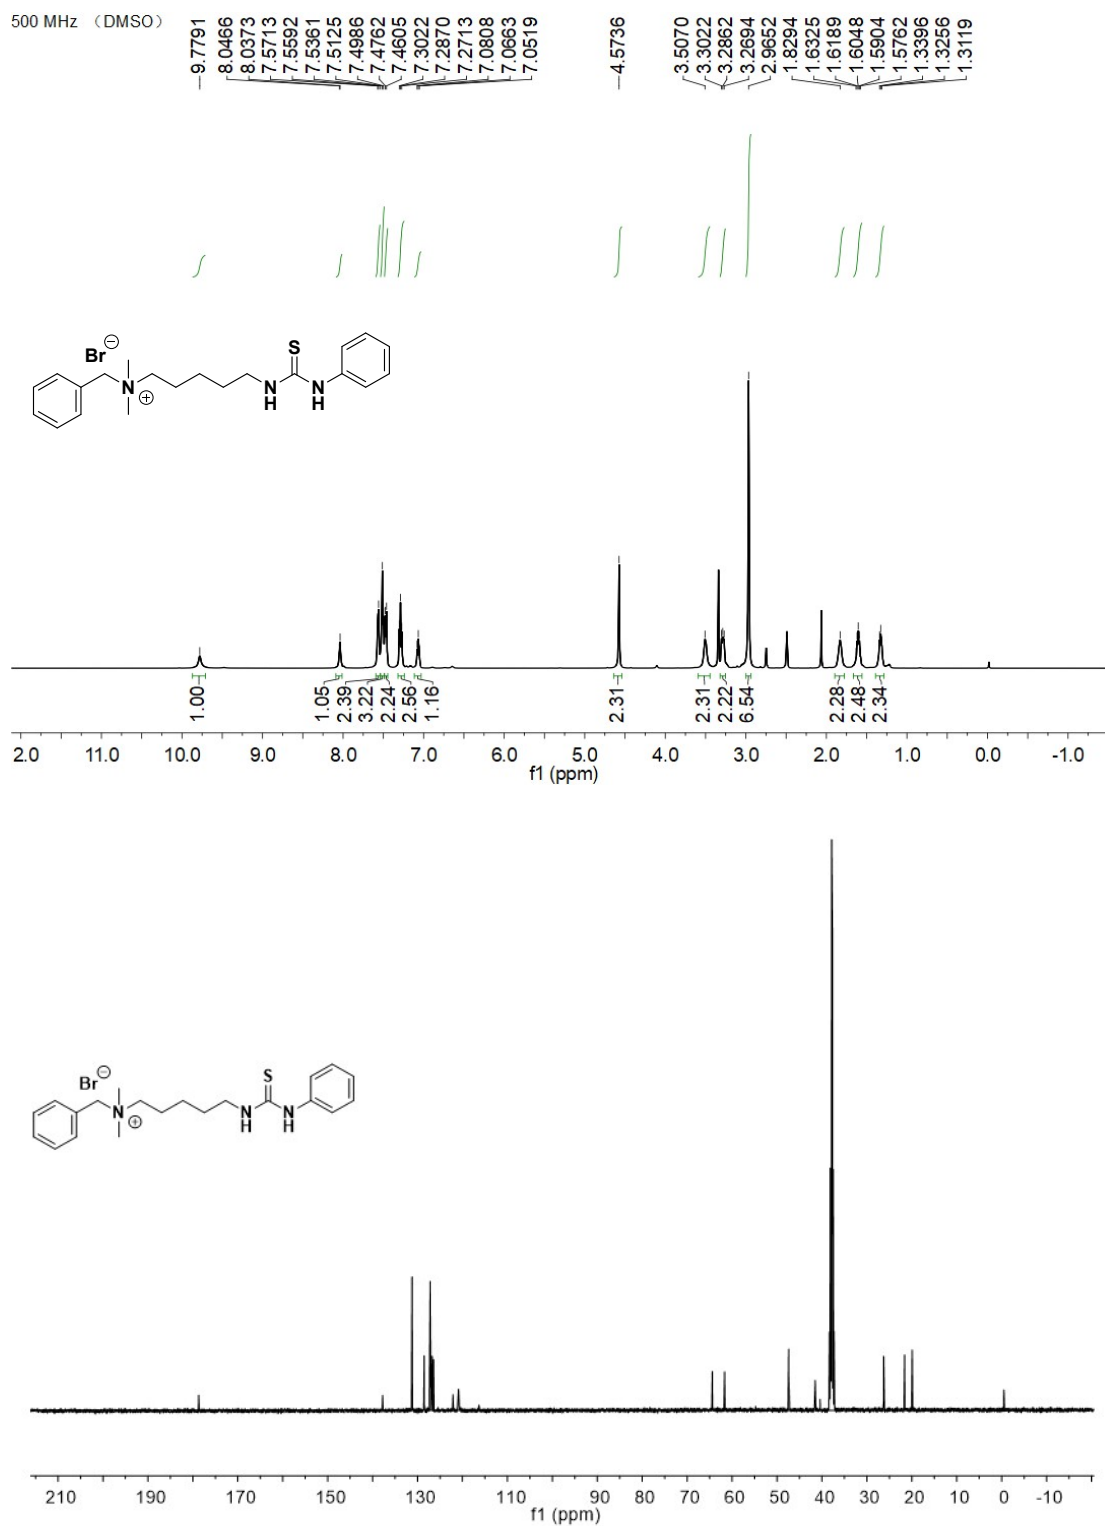

**Figure S9** <sup>1</sup>H (500 M) and <sup>13</sup>C (126 M) NMR spectra for the bifunctional catalyst **C3** in DMSO

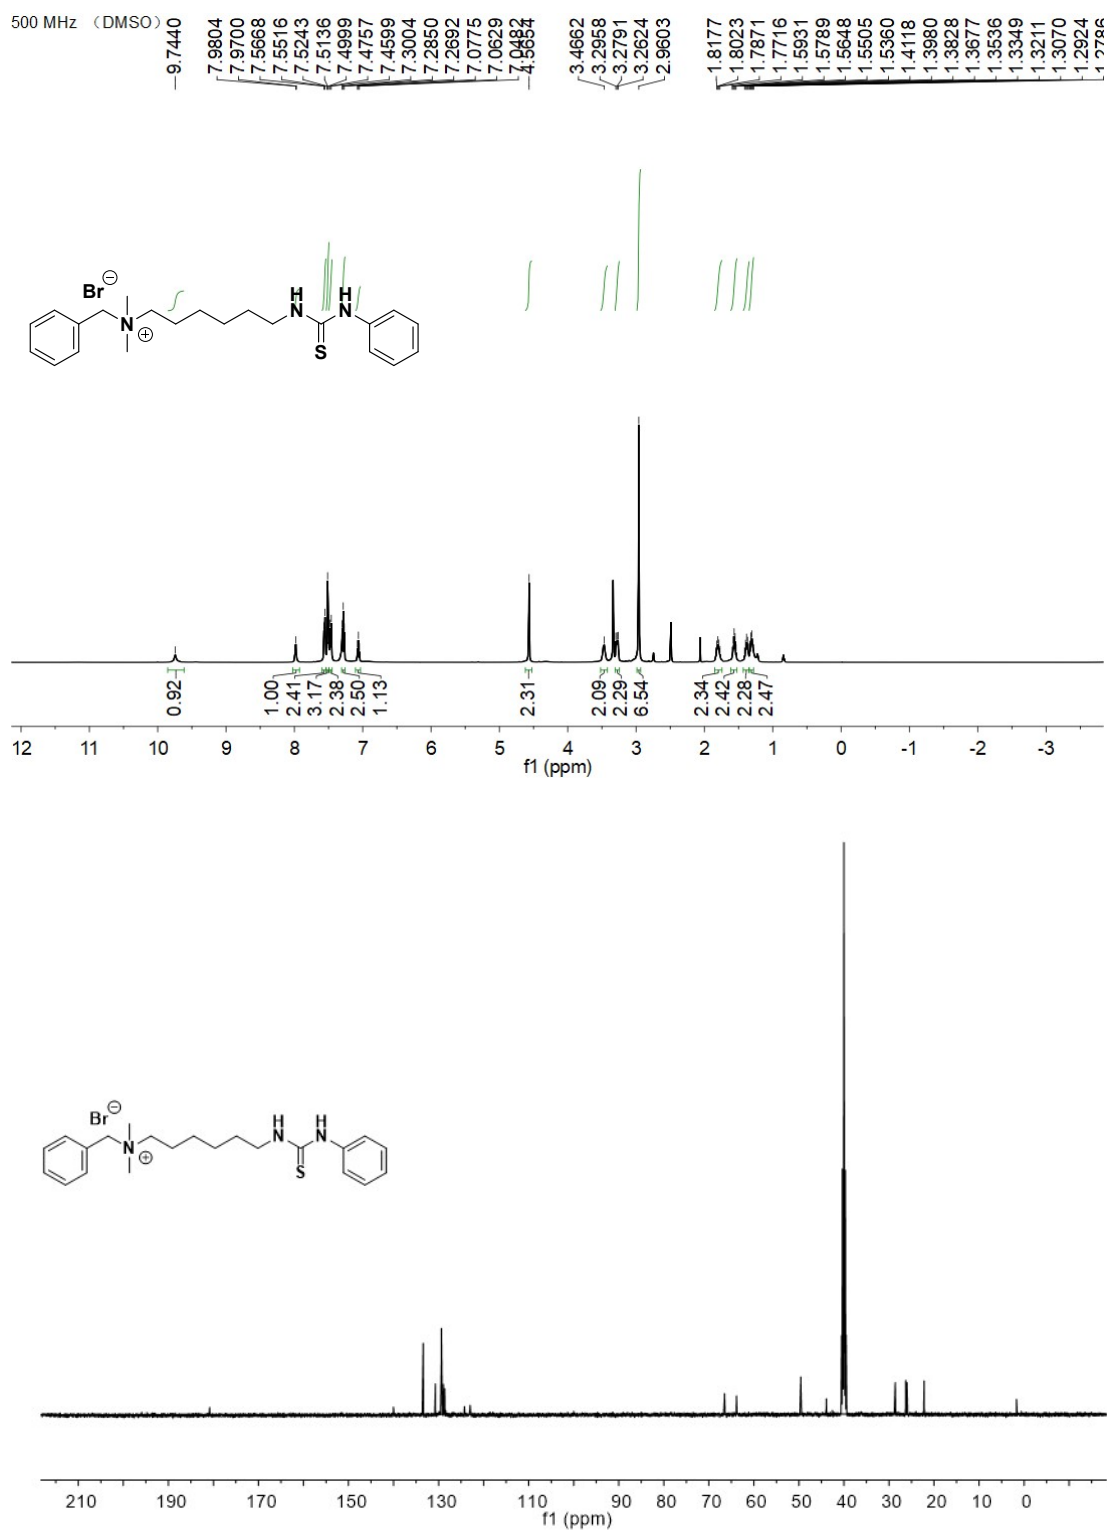

**Figure S10** <sup>1</sup>H (500 M) and <sup>13</sup>C (126 M) NMR spectra for the bifunctional catalyst C4 in DMSO

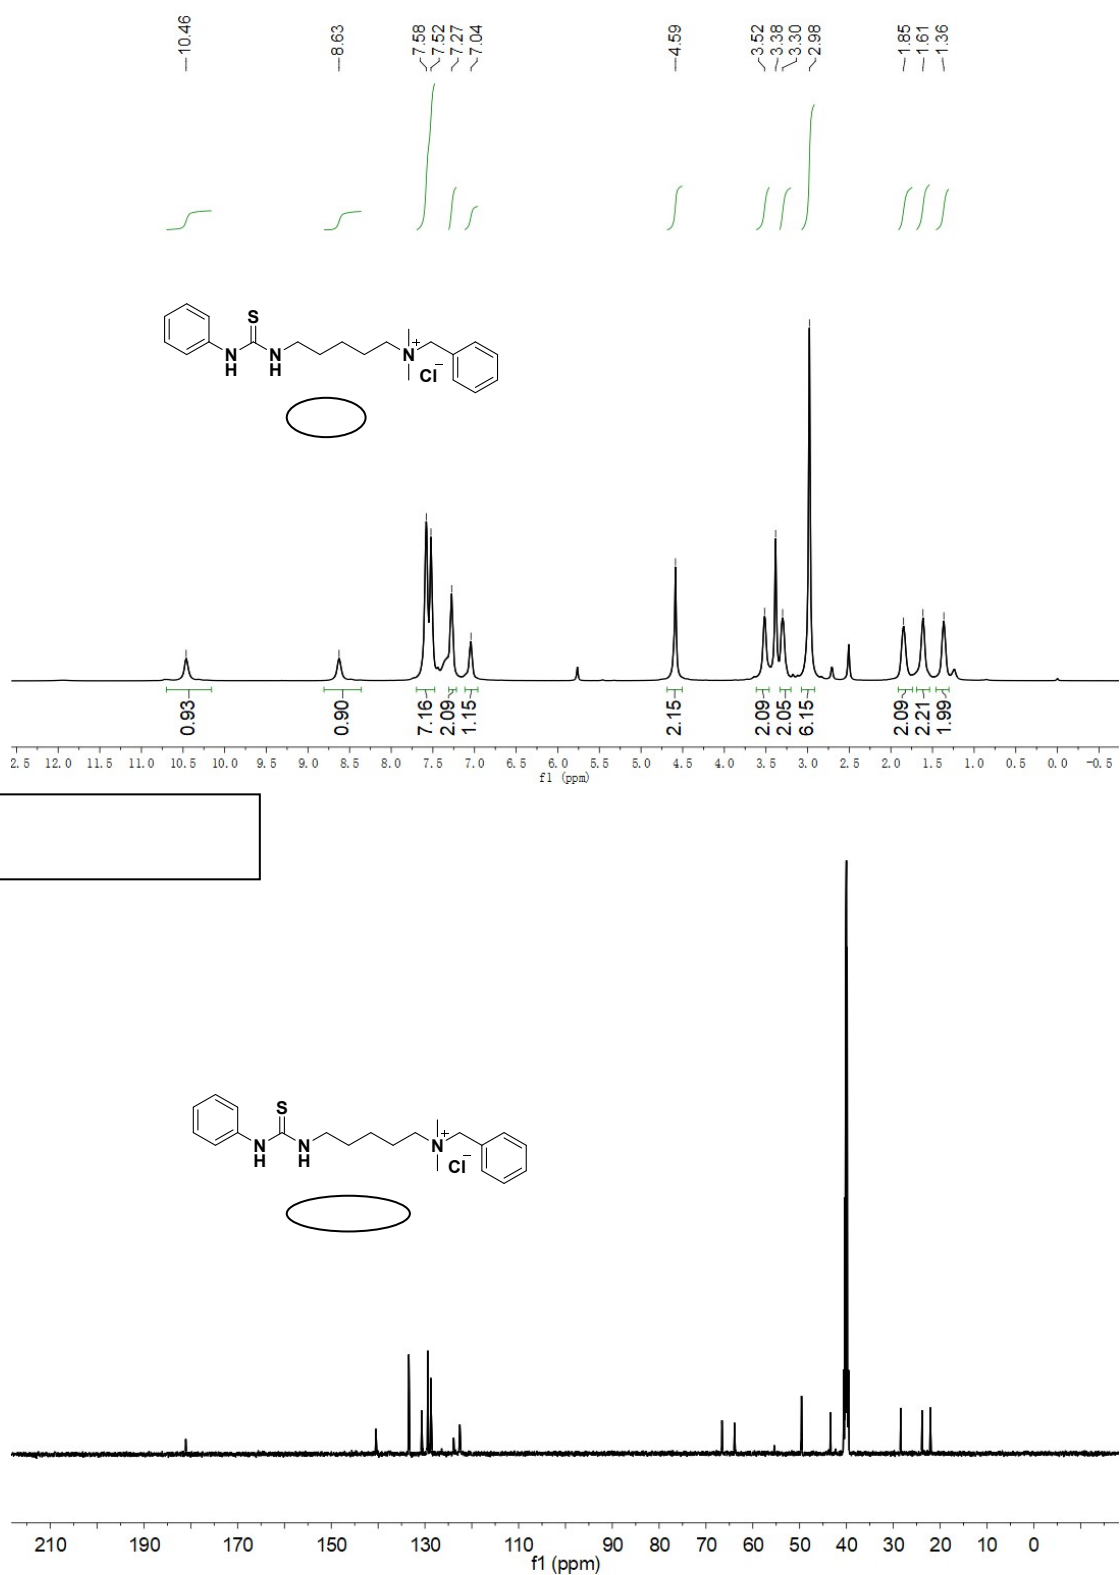

**Figure S11** <sup>1</sup>H (500 M) and <sup>13</sup>C (126 M) NMR spectra for the bifunctional catalyst **C5** in DMSO

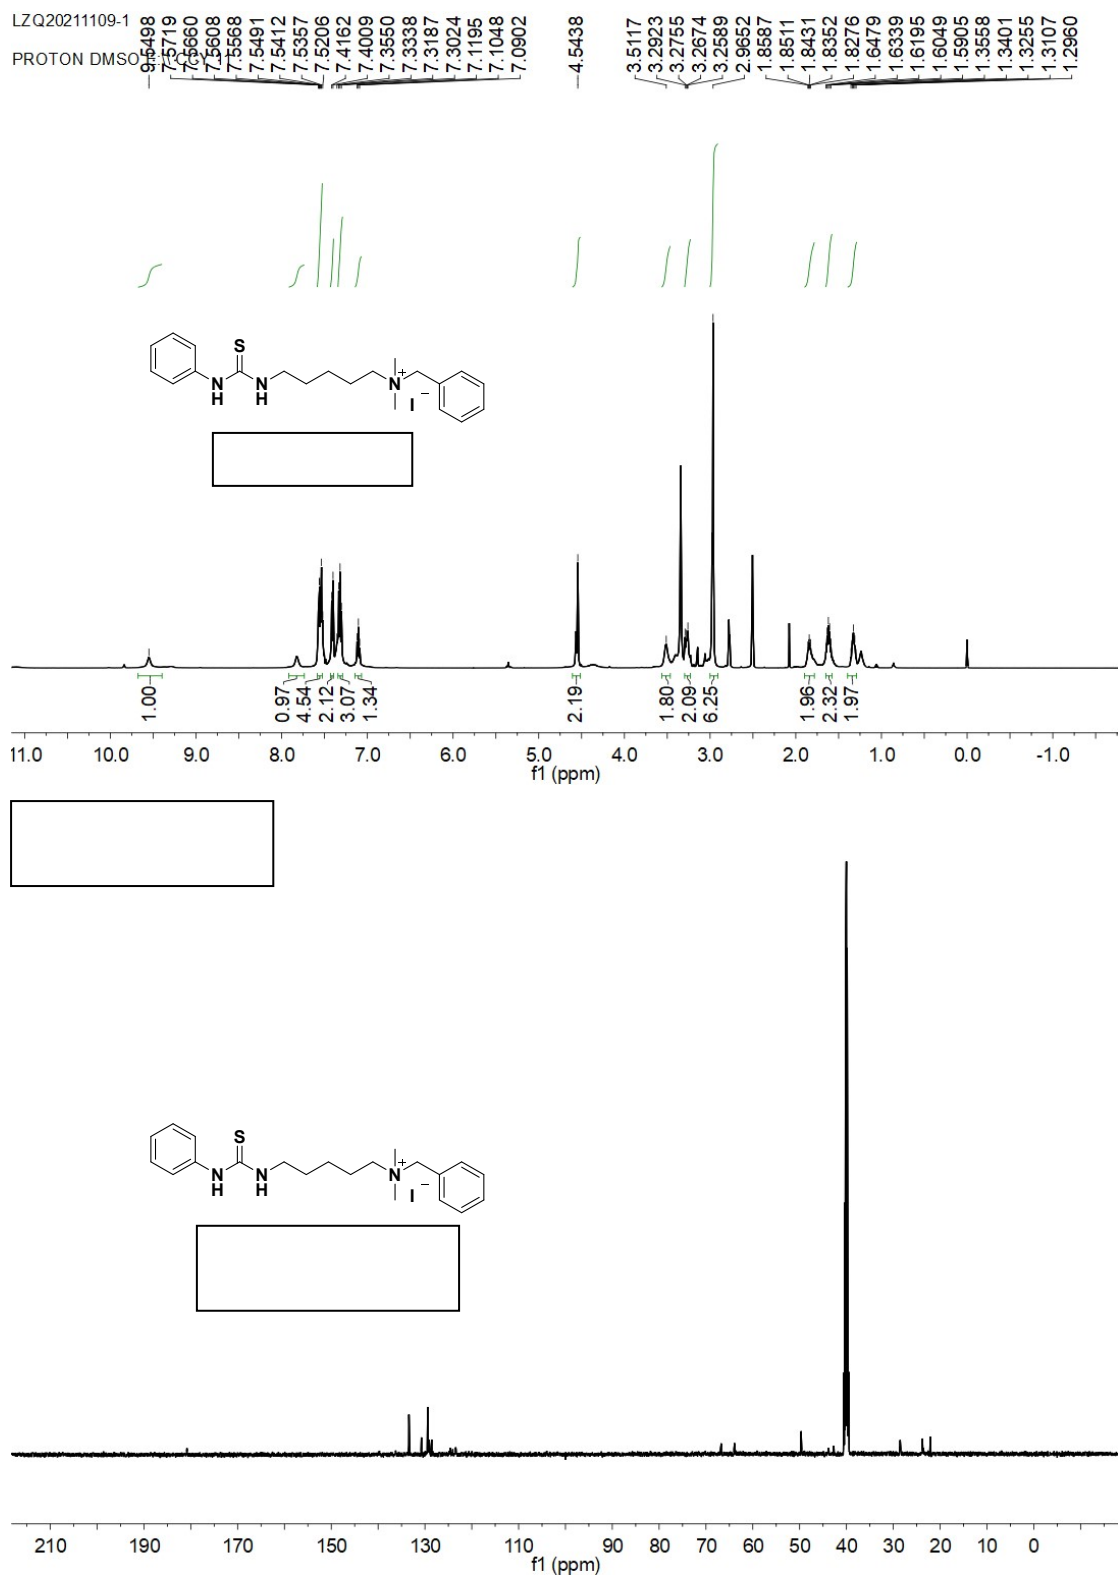

**Figure S12**  $^1\text{H}$  (500 M) and  $^{13}\text{C}$  (126 M) NMR spectra for the bifunctional catalyst C6 in DMSO

LZQ20211105  
PROTON DM E:\ CCY 28

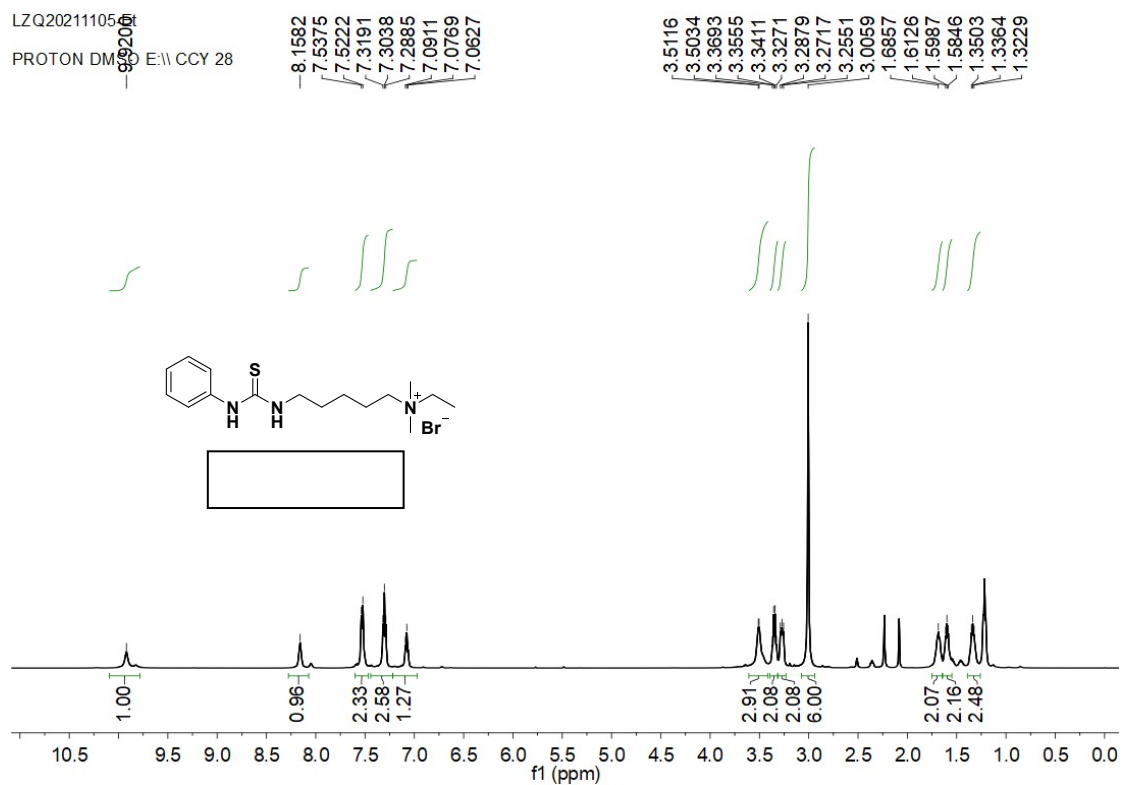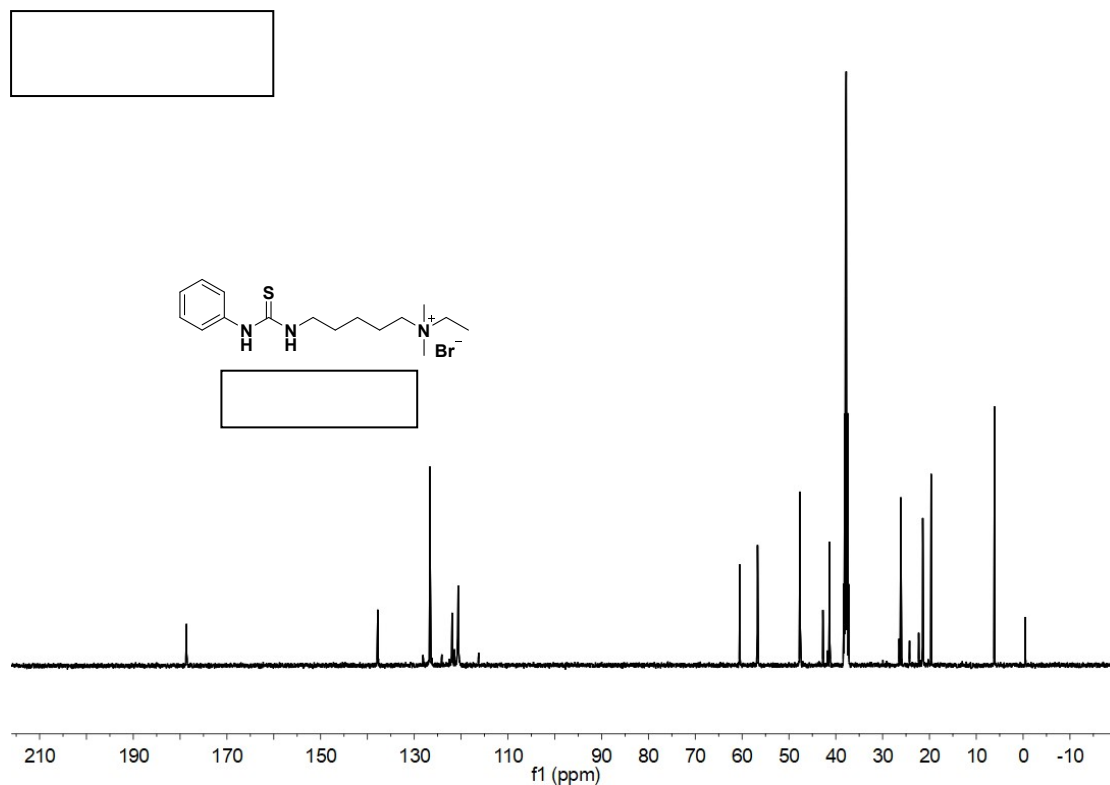

**Figure S13**  $^1\text{H}$  (500 M) and  $^{13}\text{C}$  (126 M) NMR spectra for the bifunctional catalyst **C7** in DMSO

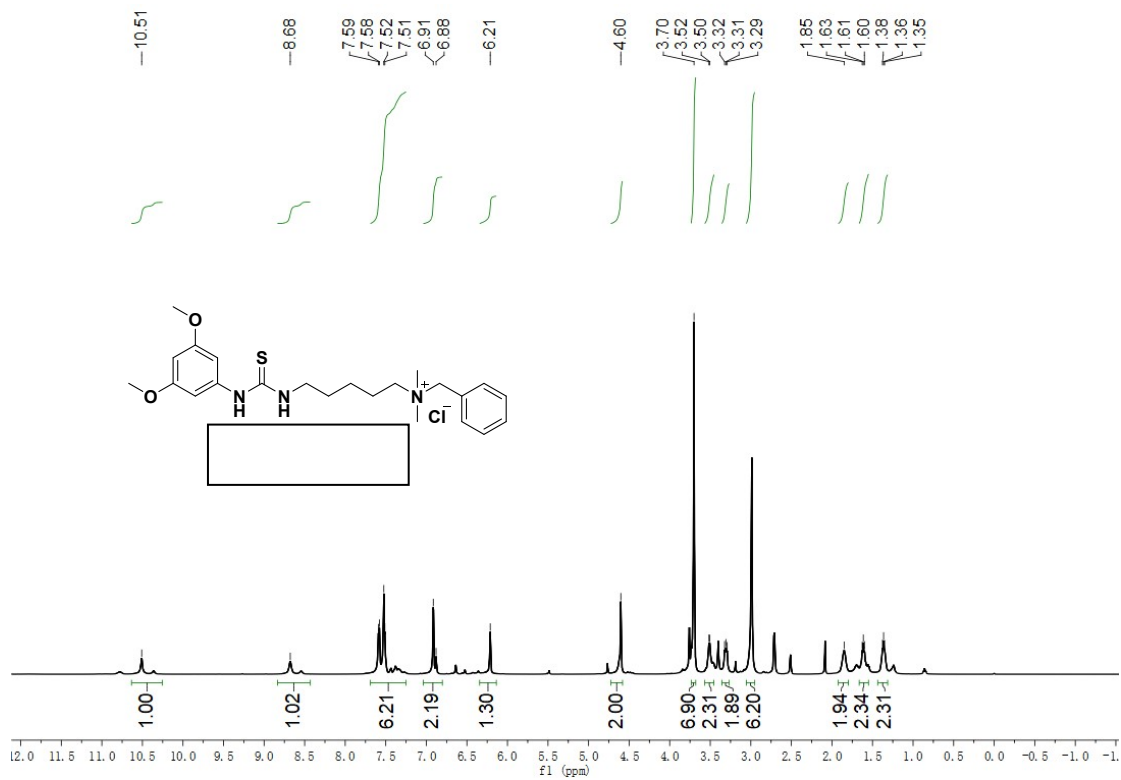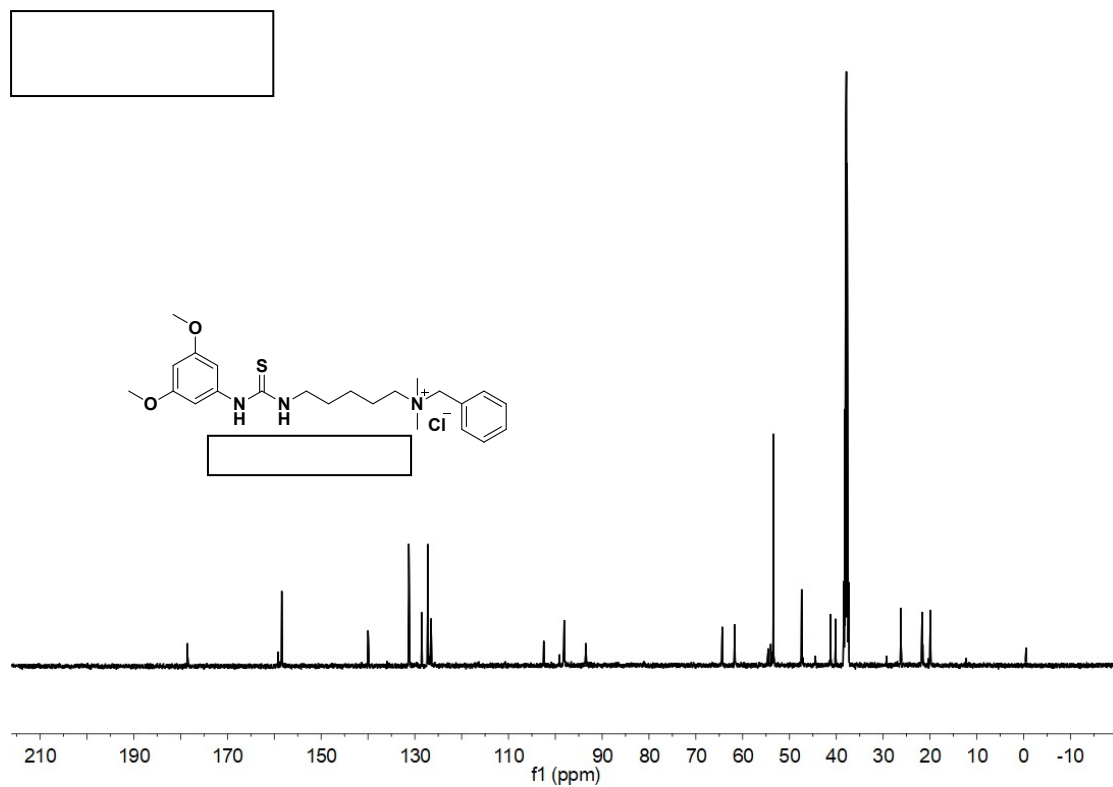

**Figure S14**  $^1\text{H}$  (500 M) and  $^{13}\text{C}$  (126 M) NMR spectra for the bifunctional catalyst **C8** in DMSO

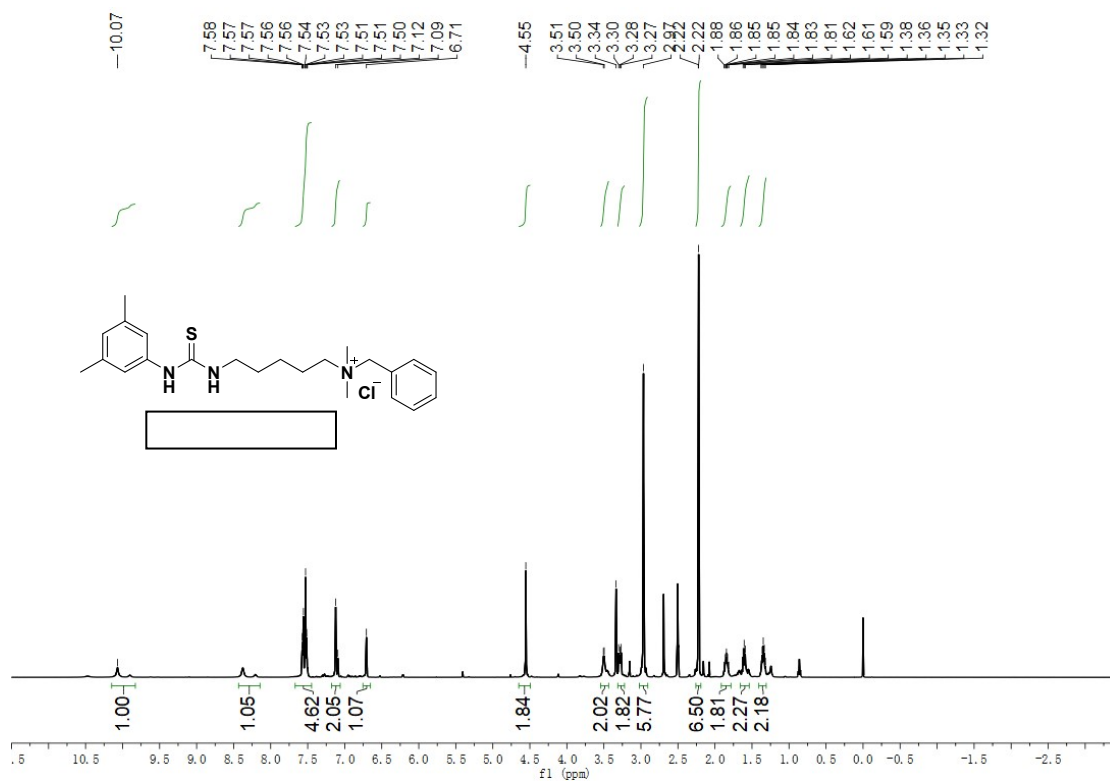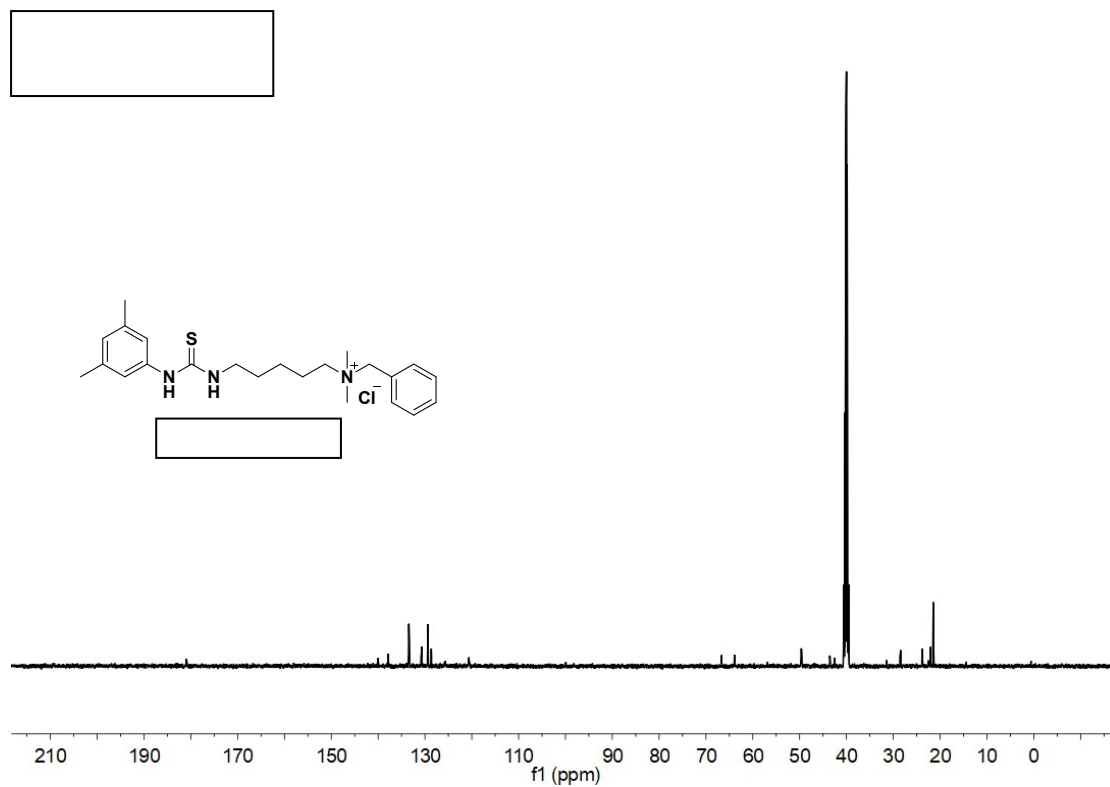

**Figure S15**  $^1\text{H}$  (500 M) and  $^{13}\text{C}$  (126 M) NMR spectra for the bifunctional catalyst C9 in DMSO

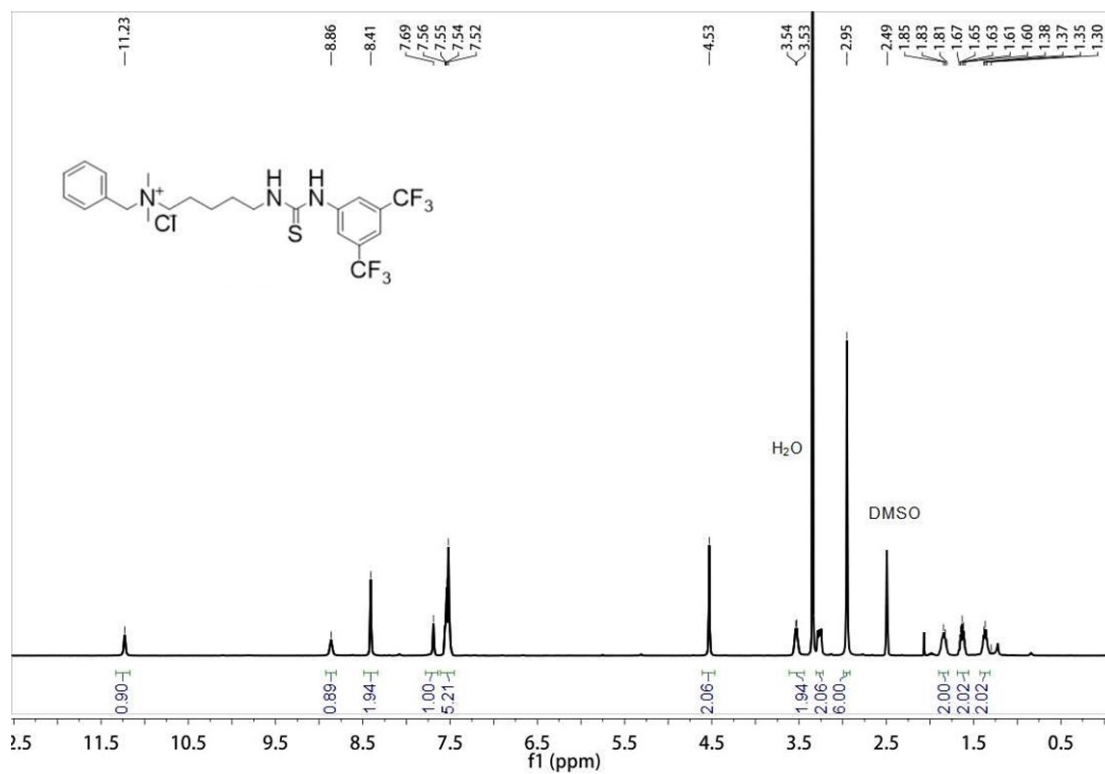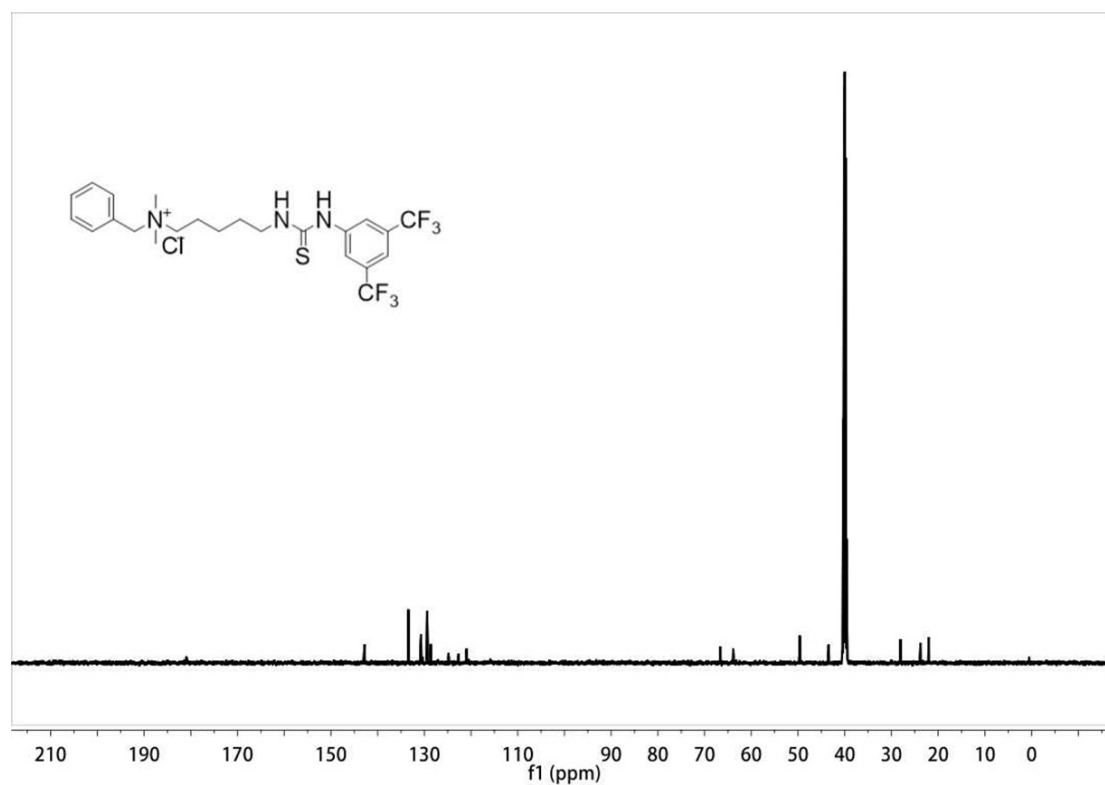

**Figure S16**  $^1\text{H}$  (500 M) and  $^{13}\text{C}$  (126 M) NMR spectra for the bifunctional catalyst **C10** in DMSO



## 7.References

1. (a) Z. Q. Li, Y. Y. Zhang, Y. J. Zheng, B. Li and G. P. Wu, *J. Org. Chem.*, 2022, **87**, 3145-3155;  
(b) K. Y. Wang, Z. Q. Li, M. N. Xu, B. Li, *Macromolecules*, 2023, **56**, 5599-5609.
